# Supplementary material
Source: PubMed Central journal article supplement (PMC4801116)

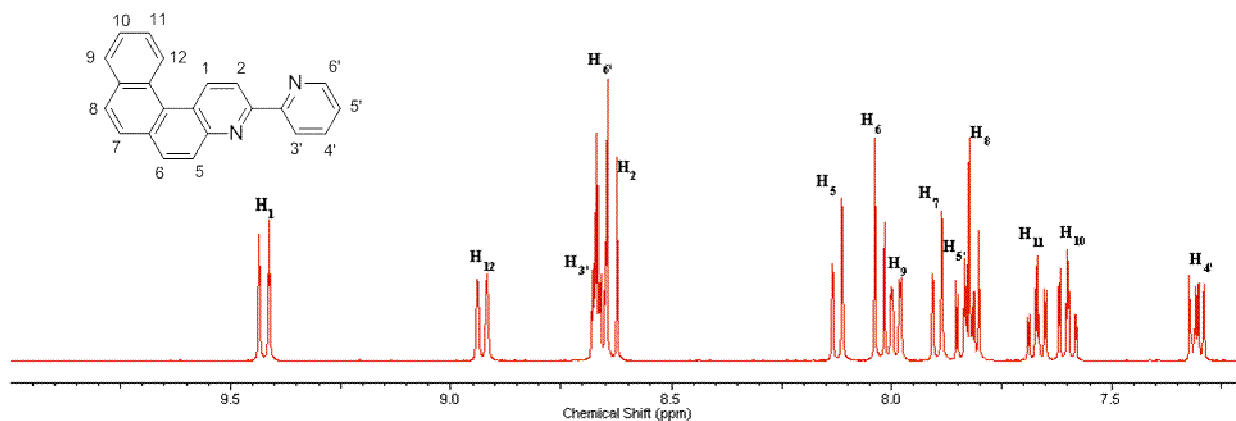

Figure S1.  $^1\text{H}$  NMR of ligand **1b** in  $\text{CD}_2\text{Cl}_2$  (400 MHz).

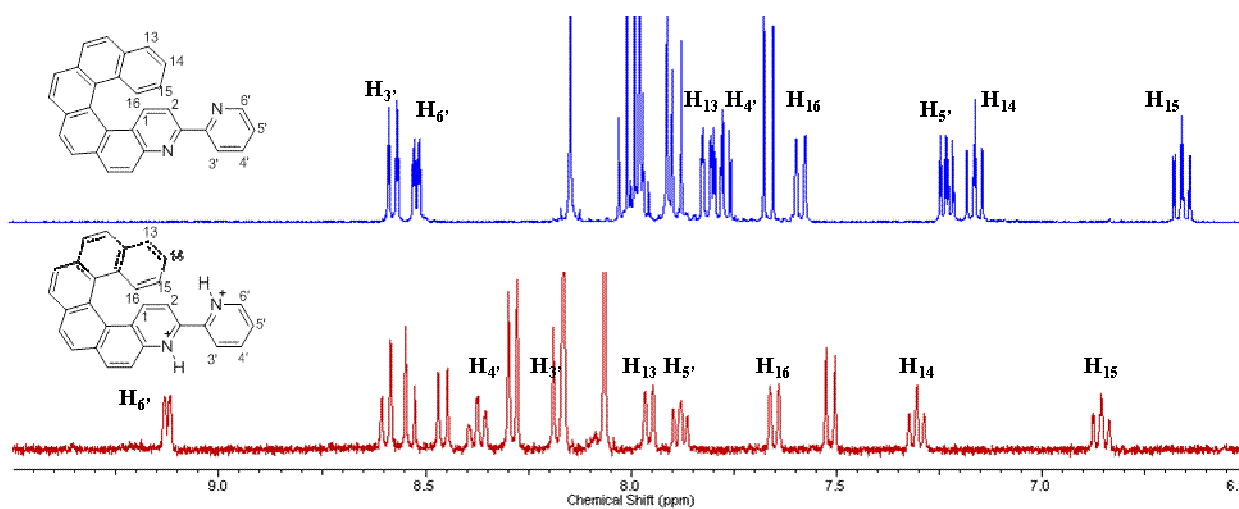

Figure S2.  $^1\text{H}$  NMR of ligand **1a** and  $[\mathbf{1a}, 2\text{H}^+][2\text{BF}_4^-]$  in  $\text{CD}_2\text{Cl}_2$  (400 MHz).

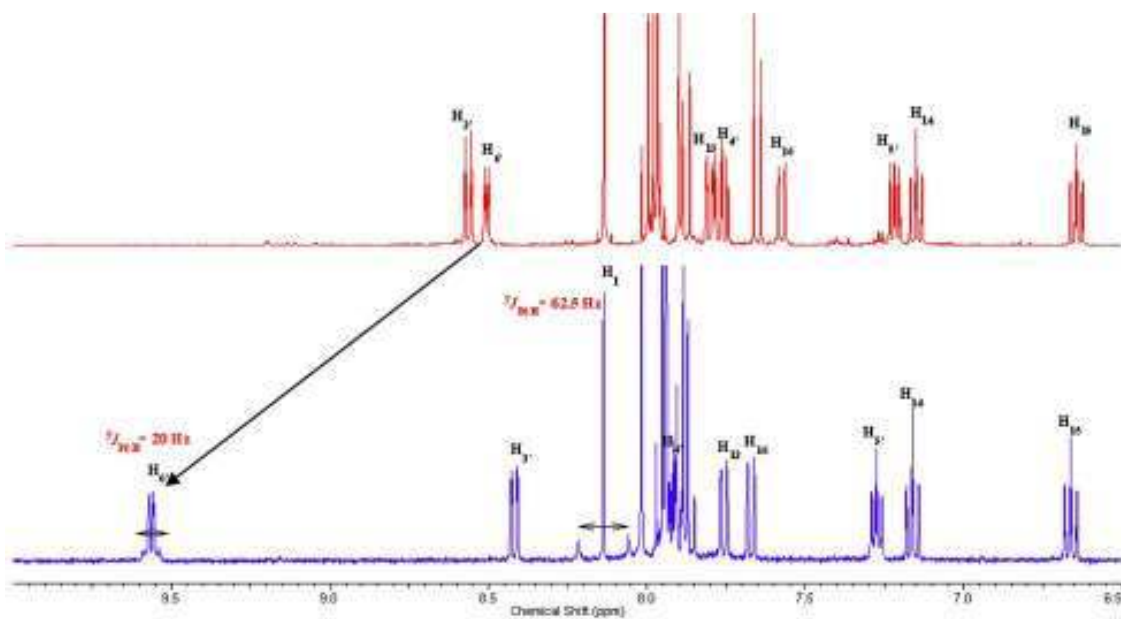

Figure S3: Aromatic part of  $^1\text{H}$  NMR spectra of  $\text{H}_4$ -bpy **1a** (red) and **2a** (blue) in  $\text{CD}_2\text{Cl}_2$  (400 MHz).

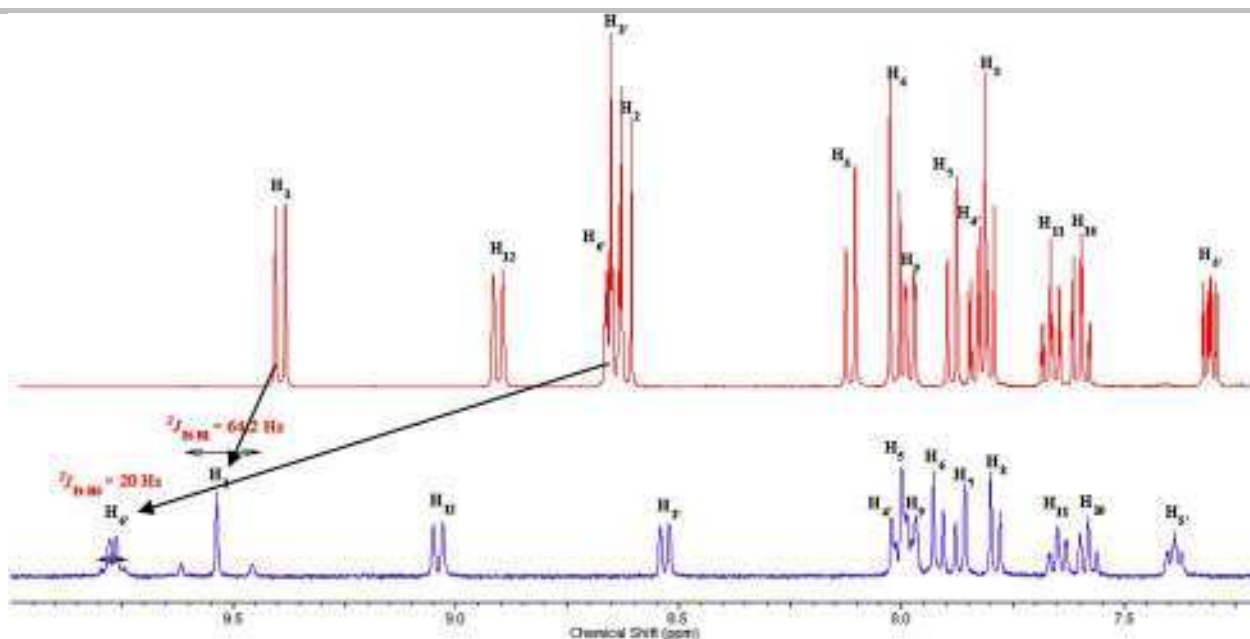

**Figure S4:** Aromatic part of <sup>1</sup>H NMR spectra of H<sub>4</sub>-bpy **1b** (red) and **2b** (blue) in CD<sub>2</sub>Cl<sub>2</sub> (400 MHz).

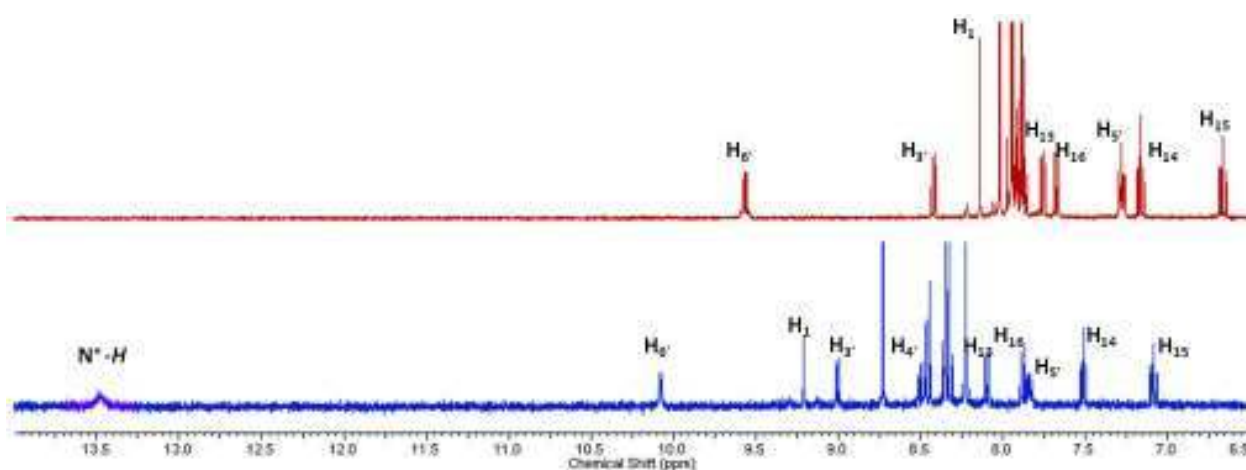

**Figure S5:** Aromatic region <sup>1</sup>H NMR spectra of protonated "roll-over" cyclometalated [2a, H<sup>+</sup>][BF<sub>4</sub><sup>-</sup>] complex (blue) in CD<sub>2</sub>Cl<sub>2</sub> (400 MHz), compared to **2a** (red).

## HPLC separations

### Analytical chiral HPLC separation for compound **1a**

• The sample is dissolved in a mixture ethanol/chloroform (1/1), injected on the chiral columns, and detected with an UV detector at 254 nm and a polarimeter. The flow-rate is 1 ml/min.

| Column       | Mobile Phase                     | t1       | k1   | t2       | k2   | $\alpha$ | Rs   |
|--------------|----------------------------------|----------|------|----------|------|----------|------|
| Chiralpak IC | Hexane/ethanol/chloroform 90/5/5 | 6.33 (+) | 1.11 | 7.98 (-) | 1.66 | 1.50     | 2.76 |

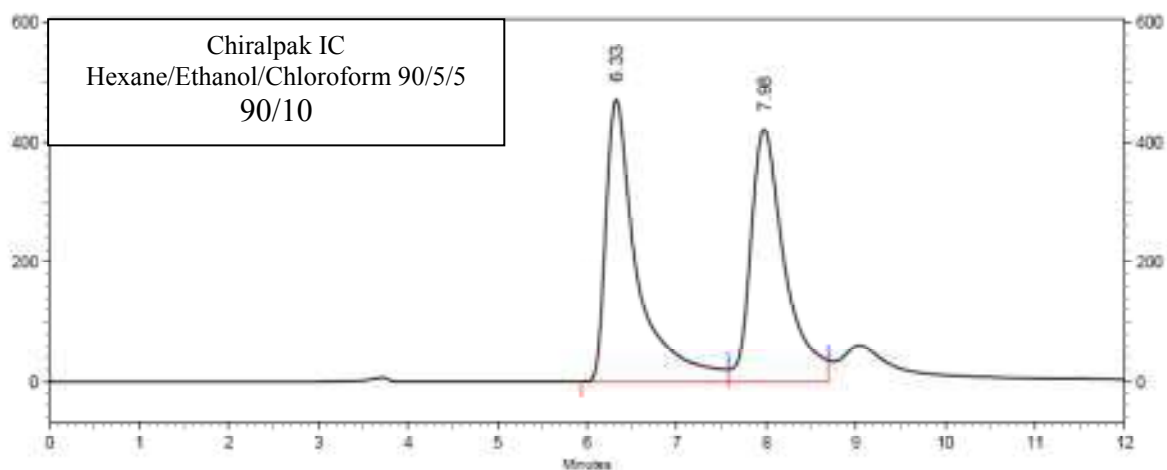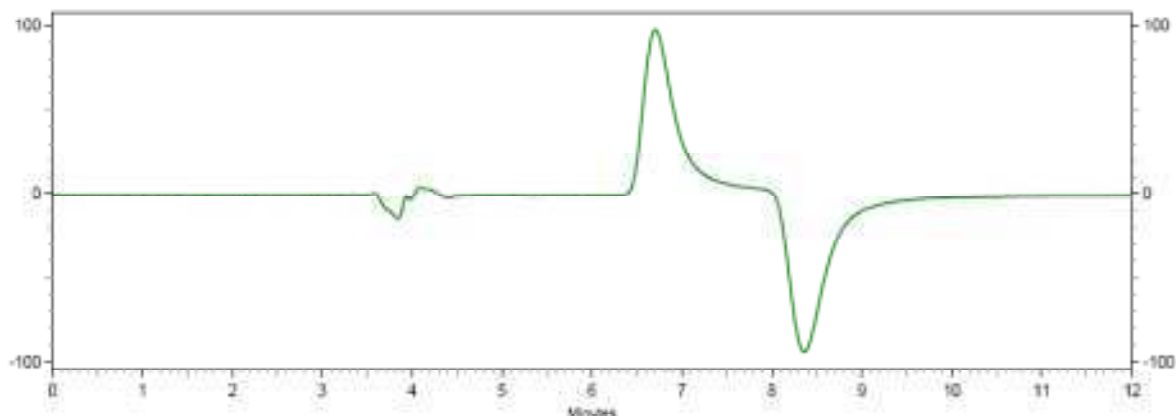

1: 254 nm, 4 nm

Results

| Retention Time | Area     | Area % | Capacity factor | Relative RT | Resolution (USP) |
|----------------|----------|--------|-----------------|-------------|------------------|
| 6.33           | 46092707 | 51.01  | 1.11            | 1.00        | 0.00             |
| 7.98           | 44259812 | 48.99  | 1.66            | 1.50        | 2.76             |

|        |          |        |
|--------|----------|--------|
| Totals | 90352519 | 100.00 |
|--------|----------|--------|

### Semi-preparative separation for compound **1a**:

- Sample preparation: About 600 mg of compound **1a** are dissolved in 280 ml of chloroform/hexane 1/1.
- Chromatographic conditions: Chiralpak IC (250 x 10 mm), thermostated at 30 °C, hexane/ethanol/chloroform 90/5/5 as mobile phase, flow-rate = 5 ml/min, UV detection at 385 nm.
- Injection: 350 times 800  $\mu$ l, every 12 minutes.
- Collection: the first eluted enantiomer is collected between 6 and 7.7 minutes and the second one between 8.2 and 10 minutes.
- First fraction: 273 mg of the first eluted ((+)-enantiomer) with *ee* > 99%
- Second fraction: 257 mg of the second eluted ((-)-enantiomer) with *ee* > 99%
- Chromatograms of the collected enantiomers:

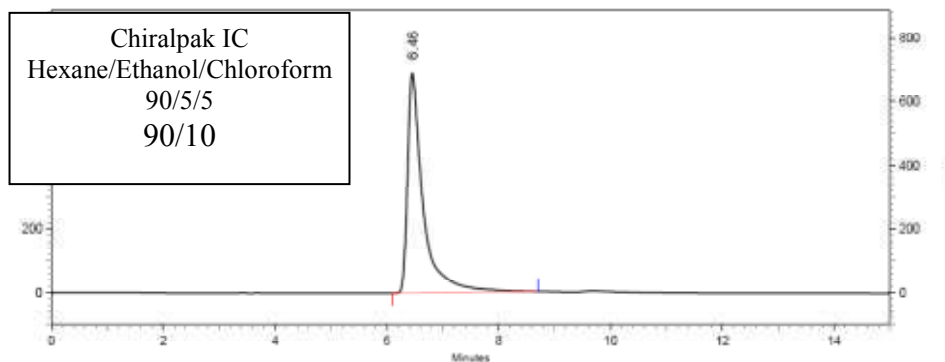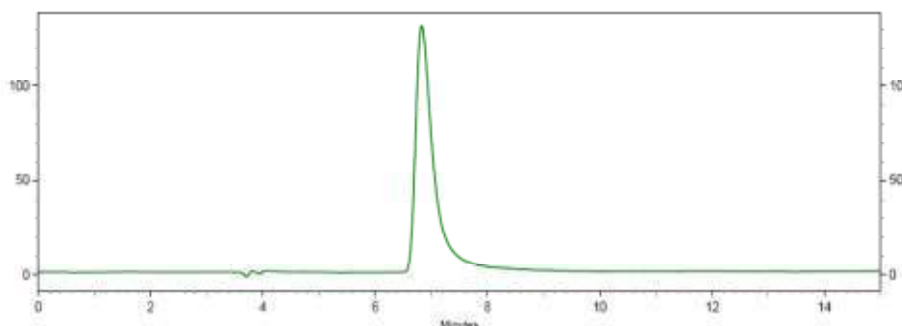

1: 254 nm, 4 nm

Results

| Retention Time | Area     | Area % | Capacity factor | Relative RT | Resolution (USP) |
|----------------|----------|--------|-----------------|-------------|------------------|
| 6.46           | 53587461 | 100.00 | 1.15            | 1.00        | 0.00             |
| Totals         | 53587461 | 100.00 |                 |             |                  |

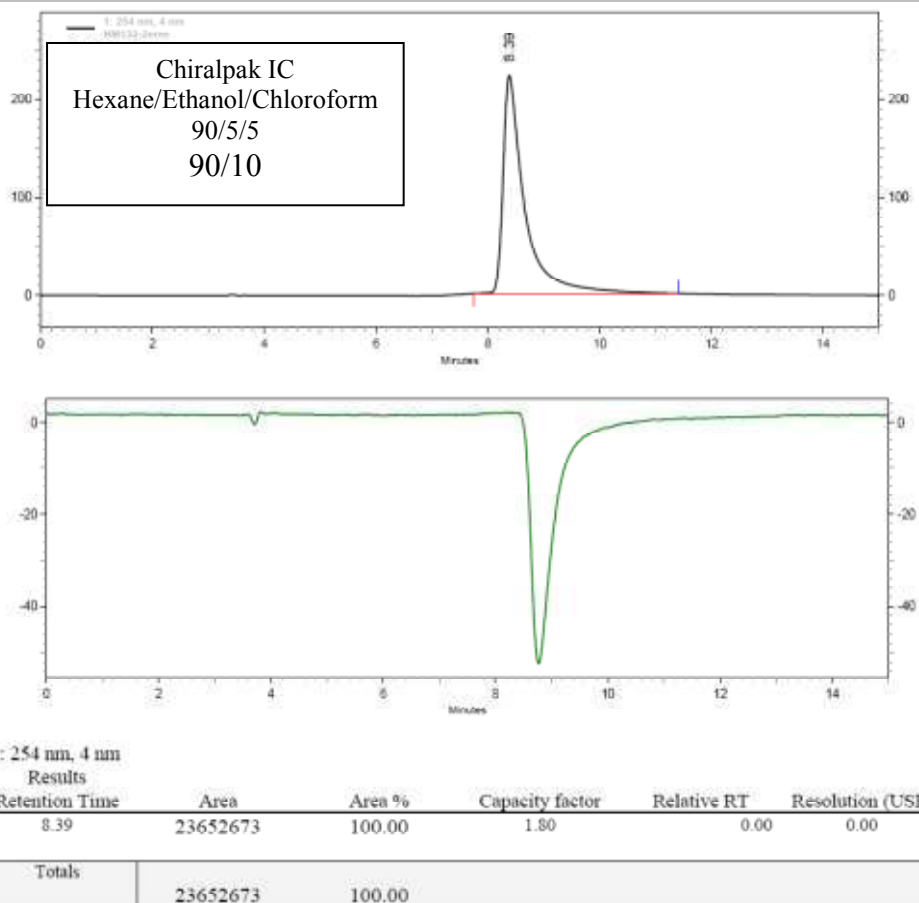

#### Analytical chiral HPLC separation for compound **1a**

• The sample is dissolved in chloroform, injected on the chiral columns, and detected with an UV detector at 254 nm and CD 254nm. The flow-rate is 1 mL/min.

| Column       | Mobile Phase                                                 | t1        | k1   | t2        | k2   | $\alpha$ | Rs   |
|--------------|--------------------------------------------------------------|-----------|------|-----------|------|----------|------|
| Chiralpak IA | Hexane / 2-PrOH with 0.1% triethylamine / chloroform (7/1/2) | 4.52 (+)  | 0.51 | 4.87 (-)  | 0.62 | 1.21     | 0.86 |
| Chiralpak IB |                                                              | 4.31      | 0.44 |           |      | 1        | 0    |
| Chiralpak IC |                                                              | 5.17 (-)  | 0.72 | 8.05 (+)  | 1.68 | 2.33     | 4.95 |
| Chiralpak ID |                                                              | 5.35 (+)  | 0.78 | 8.16 (-)  | 1.72 | 2.19     | 6.43 |
| Chiralpak IE |                                                              | 10.40 (-) | 2.47 | 14.06 (+) | 3.69 | 1.49     | 3.87 |
| Chiralpak IF |                                                              | 5.59 (+)  | 0.86 | 6.13 (-)  | 1.04 | 1.21     | 1.30 |

### Experimental optical rotation values

*P*-(+)-**1a**:  $[\alpha]_D^{23} = +2955$ ,  $[\phi]_D^{23} = +12000$  ( $\pm 5\%$ ),  $\text{CH}_2\text{Cl}_2$ ,  $6.5 \cdot 10^{-5} \text{ mol}\cdot\text{L}^{-1}$ )

*M*-(-)-**1a**:  $[\alpha]_D^{23} = -2951$ ,  $[\phi]_D^{23} = -11995$  ( $\pm 5\%$ ),  $\text{CH}_2\text{Cl}_2$ ,  $6 \cdot 10^{-5} \text{ mol}\cdot\text{L}^{-1}$ )

*P*-[**1a**, $2\text{H}^+$ ][ $2\text{BF}_4^-$ ]:  $[\alpha]_D^{23} = +1700$ ,  $[\phi]_D^{23} = +10000$  ( $\pm 5\%$ ), in  $\text{CH}_2\text{Cl}_2$ ,  $1.7 \cdot 10^{-4} \text{ M}$ )

*M*-[**1a**, $2\text{H}^+$ ][ $2\text{BF}_4^-$ ]:  $[\alpha]_D^{23} = -1660$ ,  $[\phi]_D^{23} = -9663$  ( $\pm 5\%$ ), in  $\text{CH}_2\text{Cl}_2$ ,  $1.7 \cdot 10^{-4} \text{ M}$ )

*P*-(+)-**2a**:  $[\alpha]_D^{23} = +2700$ ,  $[\phi]_D^{23} = +18730$  ( $\pm 5\%$ ),  $\text{CH}_2\text{Cl}_2$ ,  $7 \cdot 10^{-5} \text{ mol}\cdot\text{L}^{-1}$ )

*M*-(-)-**2a**:  $[\alpha]_D^{23} = -2695$ ,  $[\phi]_D^{23} = -18700$  ( $\pm 5\%$ ),  $\text{CH}_2\text{Cl}_2$ ,  $6 \cdot 10^{-5} \text{ mol}\cdot\text{L}^{-1}$ )

*P*-[**2a**, $\text{H}^+$ ][ $\text{BF}_4^-$ ]:  $[\alpha]_D^{23} = +1170$ ,  $[\phi]_D^{23} = +9145$  ( $\pm 5\%$ ), in  $\text{CH}_2\text{Cl}_2$ ,  $1.5 \cdot 10^{-5} \text{ M}$ )

*M*-[**2a**, $\text{H}^+$ ][ $\text{BF}_4^-$ ]:  $[\alpha]_D^{23} = -1188$ ,  $[\phi]_D^{23} = -9281$  ( $\pm 5\%$ ), in  $\text{CH}_2\text{Cl}_2$ ,  $10^{-4} \text{ M}$ )

### Experimental UV-vis and circular dichroism spectra

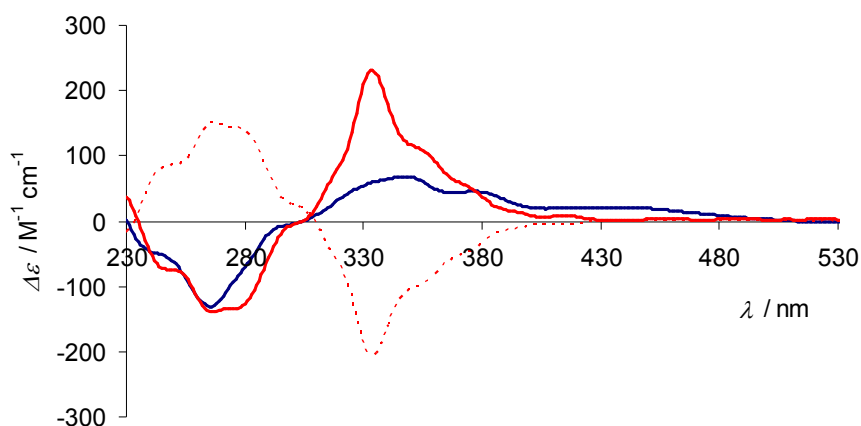

**Figure S6.** ECD spectra of *P*-**1a** (red plain lines), *M*-**1a** (red dashed lines) and *P*-[**1a**, $2\text{H}^+$ ][ $2\text{BF}_4^-$ ] (blue plain lines) in  $\text{CH}_2\text{Cl}_2$ .

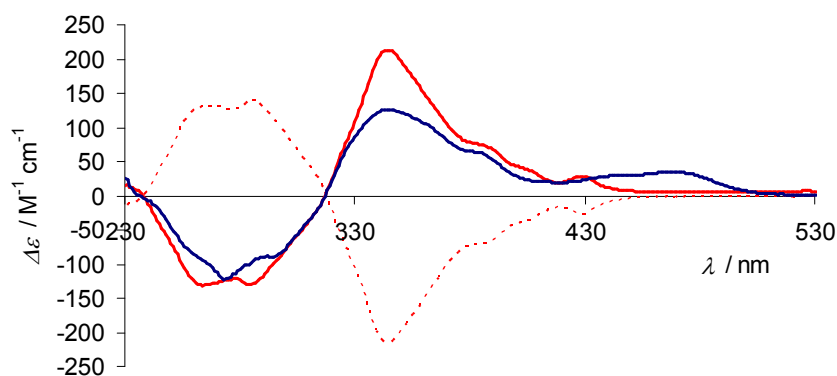

**Figure S7.** ECD spectra of *P*-**2a** (red plain lines), *M*-**2a** (red dashed lines) and *P*-[**2a**, $\text{H}^+$ ][ $\text{BF}_4^-$ ] (blue plain lines) in  $\text{CH}_2\text{Cl}_2$ .

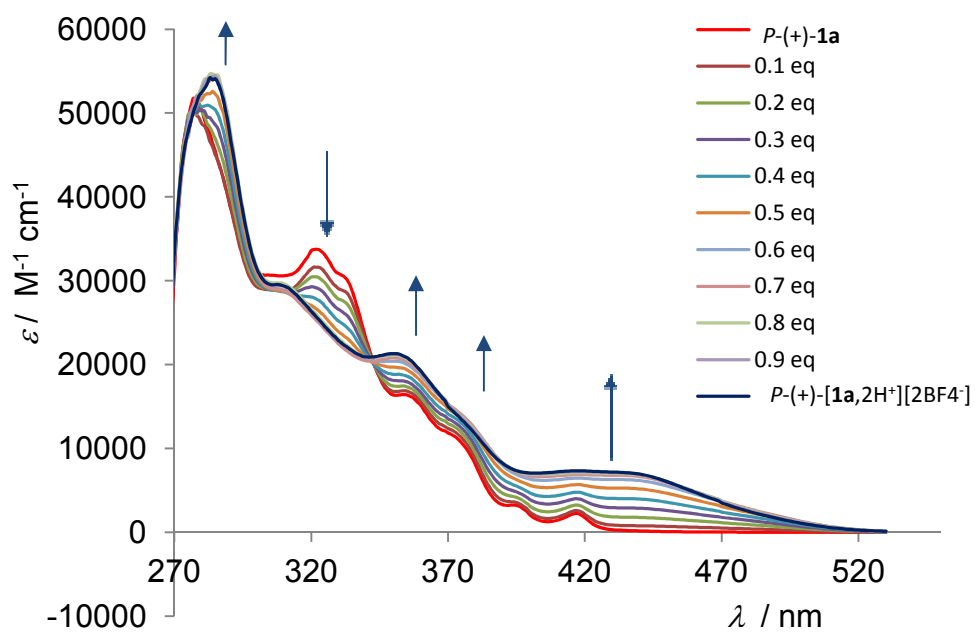

**Figure S8.** UV-Vis titration in  $\text{CH}_2\text{Cl}_2$  of **1a** upon additions of  $[\text{H}_2\text{O.HBF}_4]_2[18\text{C}6]$ .

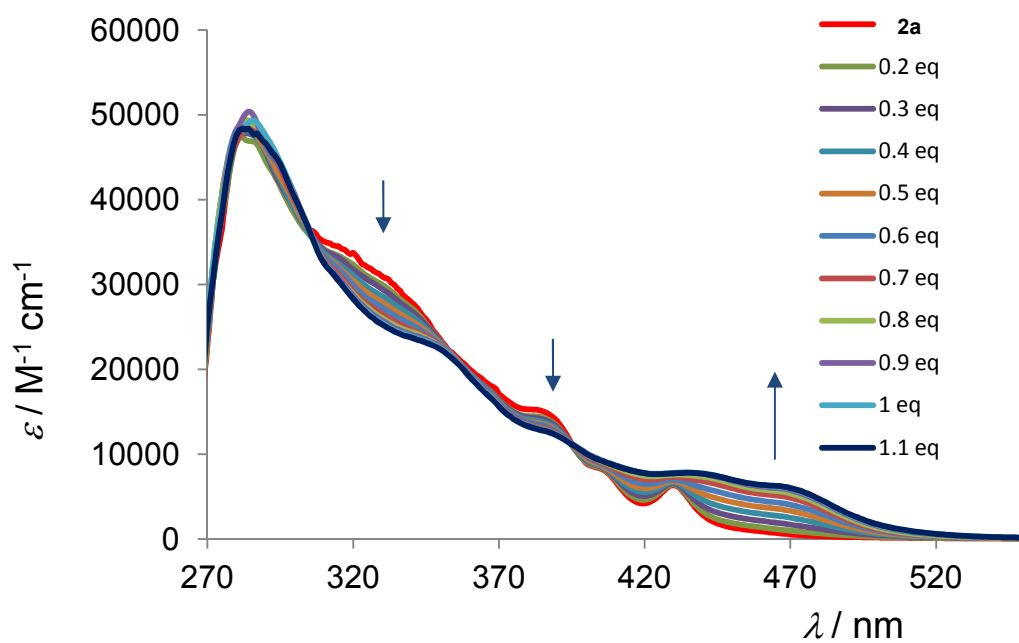

**Figure S9.** UV-Vis titration in  $\text{CH}_2\text{Cl}_2$  of **2a** upon additions of  $[\text{H}_2\text{O.HBF}_4]_2[18\text{C}6]$ .

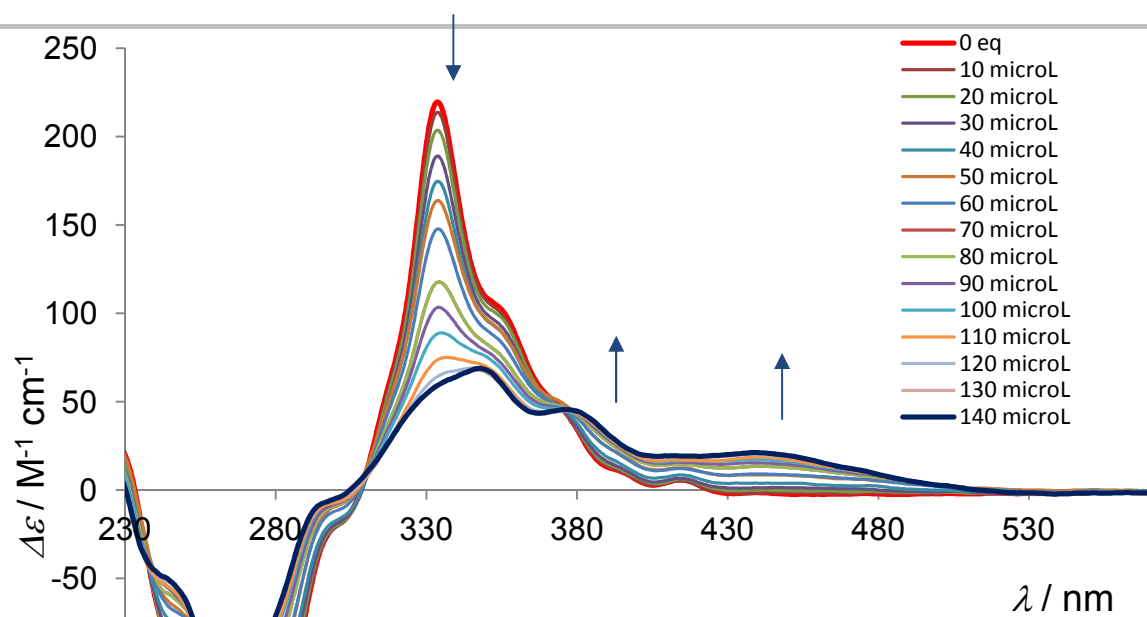

**Figure S10.** CD titration in  $\text{CH}_2\text{Cl}_2$  of *P-1a* upon additions of  $[\text{H}_2\text{O.HBF}_4]_2[18\text{C}6]$ .

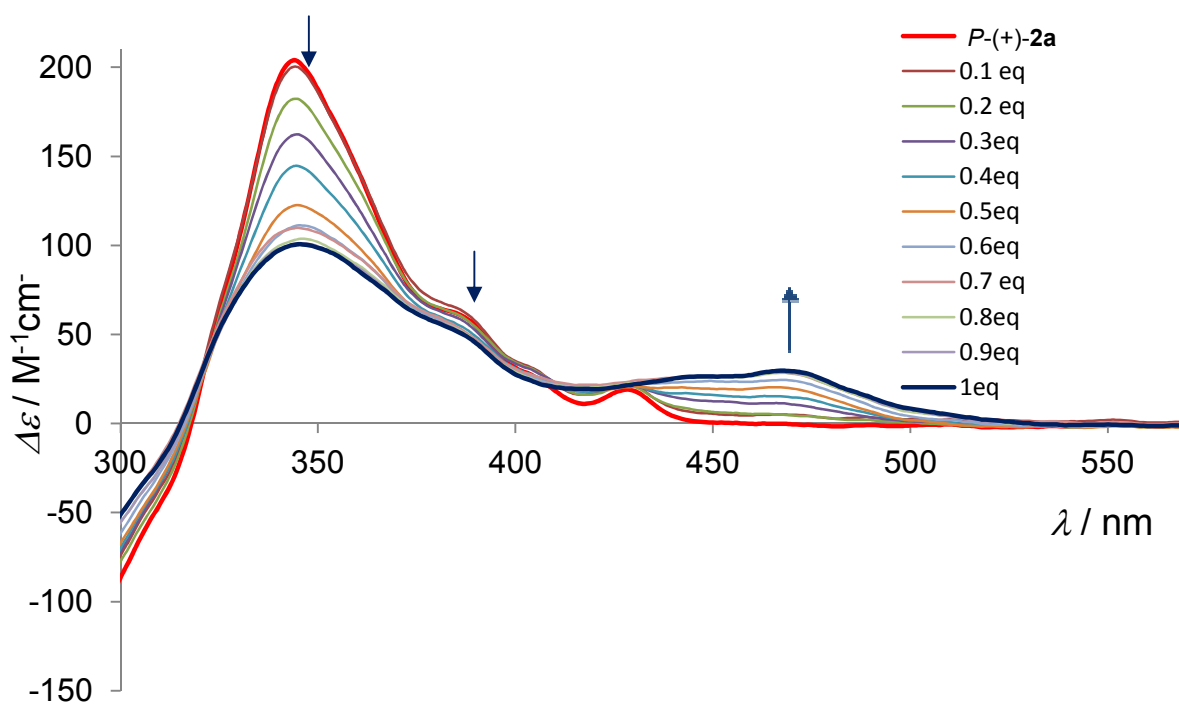

**Figure S11.** CD titration in  $\text{CH}_2\text{Cl}_2$  of *P-2a* upon additions of  $[\text{H}_2\text{O.HBF}_4]_2[18\text{C}6]$ .



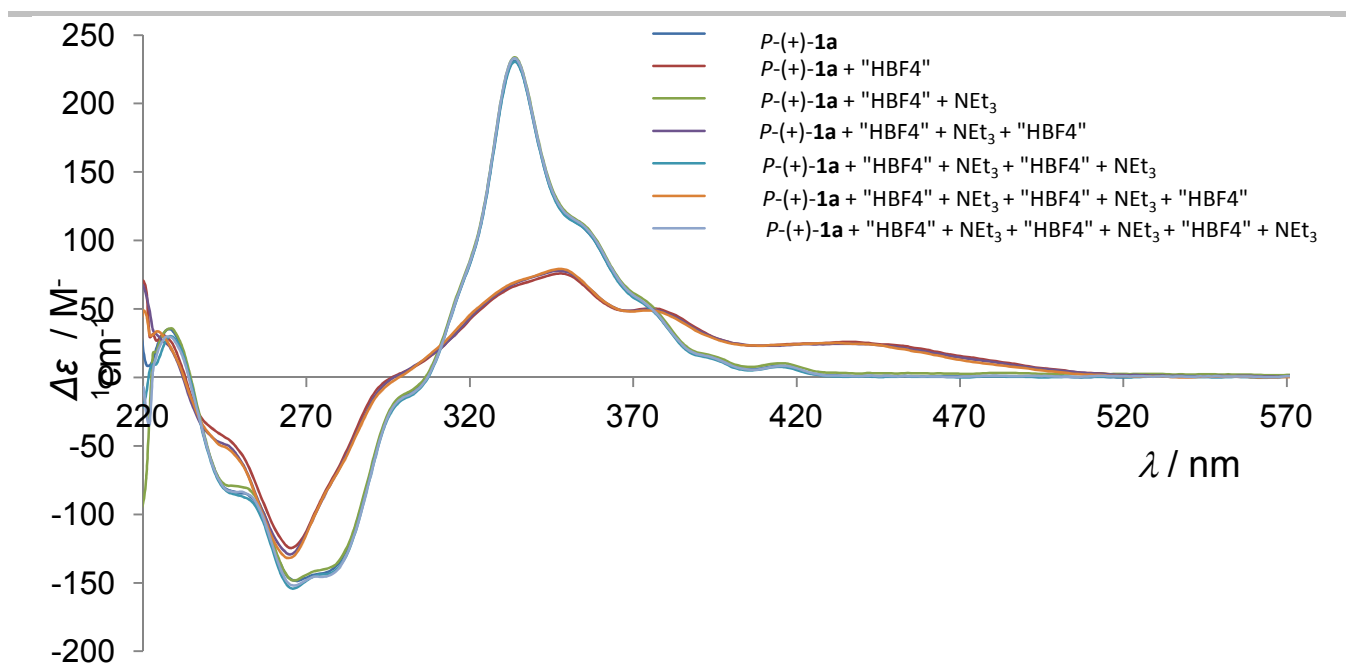

**Figure S12.** Acid-base ECD switching of complex *P*-(+)-**1a** upon successive additions of [H<sub>2</sub>O.HBF<sub>4</sub>]<sub>2</sub>[18C6] and of Et<sub>3</sub>N.

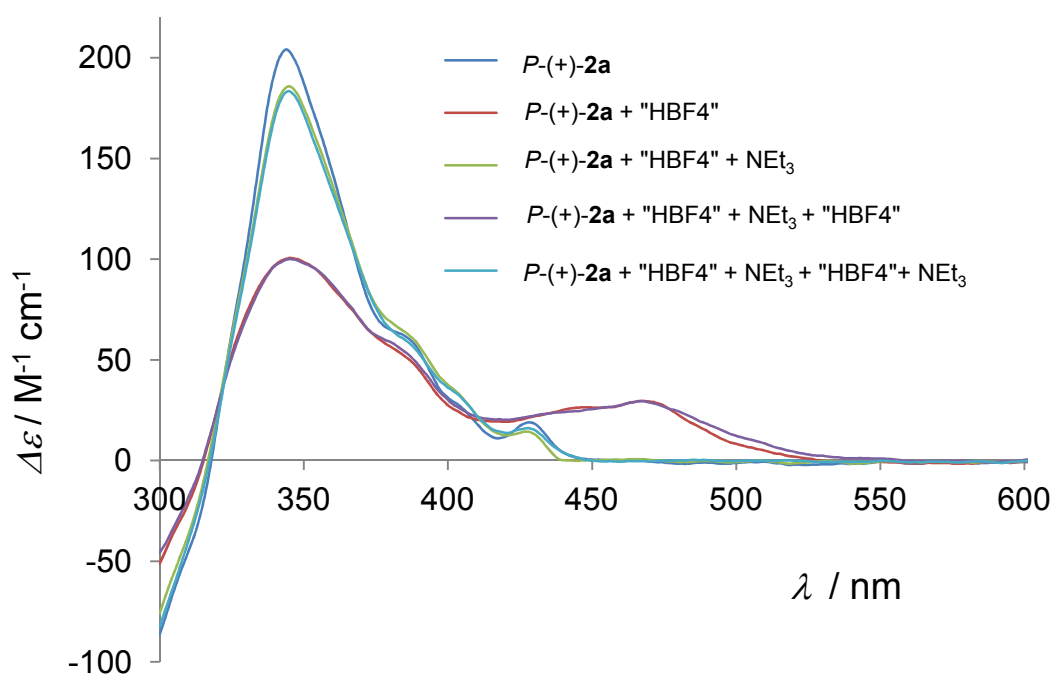

**Figure S13.** Acid-base ECD switching of complex *P*-(+)-**2a** upon successive additions of [H<sub>2</sub>O.HBF<sub>4</sub>]<sub>2</sub>[18C6] and of NEt<sub>3</sub> in acetone.

## X-Ray diffraction results

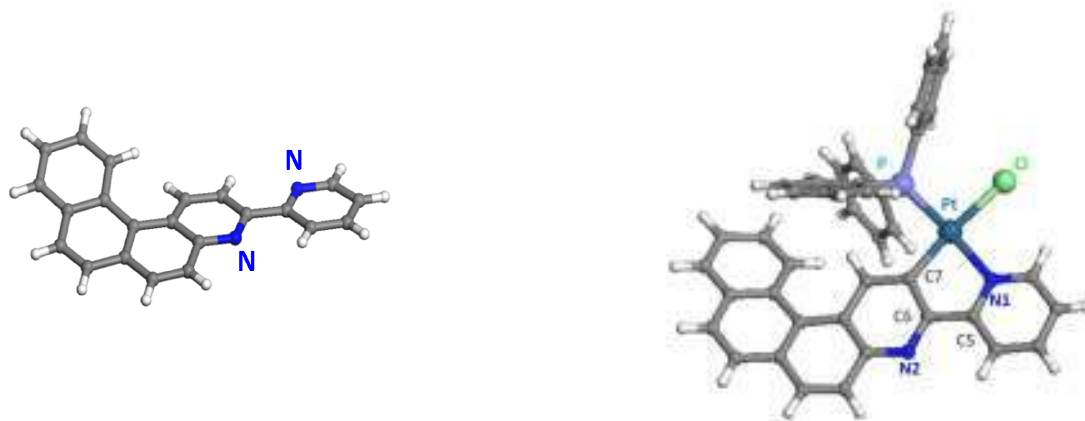

**Figure S14.** X-ray structure of ligand **1b** and of complex  $(H_4\text{-bpy})Pt(PPh_3)Cl$  **3b**

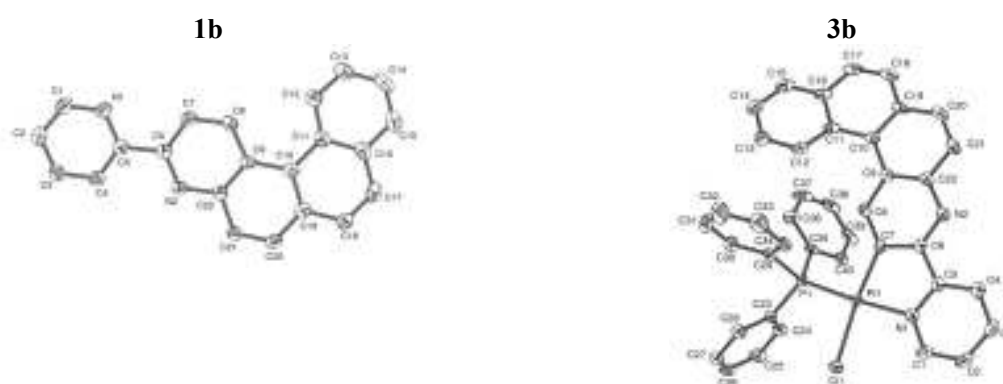

**Figure S15.** ORTEP diagrams of proligand **1b** and complex **3b** with ellipsoids at 50% probability.

**Table S1** Selected Bond Distances (Å) and Angles (deg) in **3b** in comparison with the reference  $\text{bpyPtClPPh}_3$  and the free proligand **1b**

|                                   | <b>3b</b> | $\text{bpyPtClPPh}_3^6$ | <b>1b</b> |
|-----------------------------------|-----------|-------------------------|-----------|
| Pt-Cl                             | 2.386     | 2.380                   |           |
| Pt-P                              | 2.228     | 2.223                   |           |
| Pt-N <sub>1</sub>                 | 2.108     | 2.097                   |           |
| Pt-C <sub>7</sub>                 | 2.002     | 2.008                   |           |
| N <sub>1</sub> -C <sub>5</sub>    | 1.355     | 1.349                   | 1.314     |
| C <sub>5</sub> -C <sub>6</sub>    | 1.466     | 1.463                   | 1.481     |
| C <sub>6</sub> -C <sub>7</sub>    | 1.423     | 1.416                   | 1.402     |
| Cl-Pt-P                           | 91.97°    | 92.75°                  |           |
| Cl-Pt-N <sub>1</sub>              | 92.2°     | 90.77°                  |           |
| Cl-Pt-C <sub>7</sub>              | 173.02°   | 170.97°                 |           |
| P-Pt-N <sub>1</sub>               | 175.83°   | 176.24°                 |           |
| P-Pt-C <sub>7</sub>               | 95.01°    | 95.80°                  |           |
| N <sub>1</sub> -Pt-C <sub>7</sub> | 80.81°    | 80.77°                  |           |
| Helicity                          | 28.8°     |                         | 25.31°    |

**Table S2.** X-ray crystallographic data

|                                                  | <b>1b</b>                                             | <b>3b</b>                                           |
|--------------------------------------------------|-------------------------------------------------------|-----------------------------------------------------|
| Empirical Formula                                | C <sub>22</sub> H <sub>14</sub> N <sub>2</sub>        | C <sub>40</sub> H <sub>28</sub> ClN <sub>2</sub> Pt |
| CCDC number                                      | 927001                                                | 934302                                              |
| Formula Weight                                   | 306.35                                                | 798.15                                              |
| Temperature (K)                                  | 100(2)                                                | 120(2)                                              |
| Wavelength (Å)                                   | 0.71073                                               | 0.71073                                             |
| Crystal system                                   | Orthorhombic                                          | Triclinic                                           |
| Space Group                                      | <i>P</i> 2 <sub>1</sub> 2 <sub>1</sub> 2 <sub>1</sub> | <i>P</i> -1                                         |
| a (Å)                                            | 4.7136(2)                                             | 9.3961(2)                                           |
| b (Å)                                            | 13.0891(9)                                            | 10.3378(2)                                          |
| c (Å)                                            | 23.6221(10)                                           | 15.9069(3)                                          |
| $\alpha$ (Å)                                     | 90                                                    | 91.674(2)                                           |
| $\beta$ (Å)                                      | 90                                                    | 103.563(2)                                          |
| $\gamma$ (Å)                                     | 90                                                    | 90.529(2)                                           |
| Volume (Å <sup>3</sup> )                         | 1457.41(13)                                           | 1501.18(5)                                          |
| Z                                                | 4                                                     | 2                                                   |
| Color                                            | yellow                                                | yellow                                              |
| $\rho_{\text{calculated}}$ (g.cm <sup>-3</sup> ) | 1.396                                                 | 1.766                                               |
| Absorption coefficient (mm <sup>-1</sup> )       | 0.083                                                 | 4.850                                               |
| F(000)                                           | 640.0                                                 | 784                                                 |
| Crystal size (mm)                                | 0.342*0.124*0.118                                     | 0.283*0.236*0.149                                   |
| $\theta$ range for data collection (°)           | 3.02 to 26.99                                         | 2.64 to 27.0                                        |
| Tmin                                             | 0.988                                                 | 0.264                                               |
| Tmax                                             | 0.990                                                 | 0.485                                               |
| Limiting indices                                 | -5 ≤ h ≤ 6<br>-16 ≤ k ≤ 14<br>-30 ≤ l ≤ 28            | -12 ≤ h ≤ 12<br>-13 ≤ k ≤ 13<br>-20 ≤ l ≤ 20        |
| Data completeness                                | 99.7% ( $\theta = 26.99^\circ$ )                      | 99.9% ( $\theta = 27.00^\circ$ )                    |
| Reflections collected                            | 10719                                                 | 19078                                               |
| Reflections unique                               | 3149 [R(int) = 0.0731]                                | 6528<br>[R(int) = 0.0302]                           |
| Data / restraints / parameters                   | 3149 / 0 / 217                                        | 6528 / 0 / 406                                      |
| Goodness-of-fit on $F^2$                         | 0.807                                                 | 0.989                                               |
| Final R indices [ $I > 2 \sigma(I)$ ]            | R1 = 0.0439, wR2 = 0.0765                             | R1 = 0.0202,<br>wR2 = 0.0460                        |
| R indices (all data)                             | R1 = 0.0902, wR2 = 0.0857                             | R1 = 0.0238,<br>wR2 = 0.0466                        |
| Largest diff peak and hole (e Å <sup>-3</sup> )  | 0.195 and -0.194                                      | 1.459 and -0.956                                    |

## Non-polarised luminescence measurements

### Instrumentation

Absorption spectra were measured on a Biotek Instruments XS spectrometer, using quartz cuvettes of 1 cm path length. Steady-state luminescence spectra were measured using a Jobin Yvon FluoroMax-2 spectrofluorimeter, fitted with a red-sensitive Hamamatsu R928 photomultiplier tube; the spectra shown are corrected for the wavelength dependence of the detector, and the quoted emission maxima refer to the values after correction. Samples for emission measurements were contained within quartz cuvettes of 1 cm path length modified with appropriate glassware to allow connection to a high-vacuum line. Degassing was achieved via a minimum of three freeze-pump-thaw cycles whilst connected to the vacuum manifold; final vapour pressure at 77 K was  $< 5 \times 10^{-2}$  mbar, as monitored using a Pirani gauge. Luminescence quantum yields were determined using  $[\text{Ru}(\text{bpy})_3]\text{Cl}_2$  in degassed aqueous solution as the standard ( $\Phi_{\text{lum}} = 0.042$ ); estimated uncertainty in  $\Phi_{\text{lum}}$  is  $\pm 20\%$  or better, except where indicated otherwise. Luminescence lifetimes  $< 10 \mu\text{s}$  were measured by time-correlated single-photon counting, following excitation at 374.0 nm with an EPL-375 pulsed-diode laser. The emitted light was detected at  $90^\circ$  using a Peltier-cooled R928 PMT after passage through a monochromator. Lifetimes  $> 10 \mu\text{s}$  were measured using the same detector in multichannel scaling mode following excitation with a microsecond pulsed xenon lamp. The estimated uncertainty in the quoted lifetimes is  $\pm 10\%$  or better.

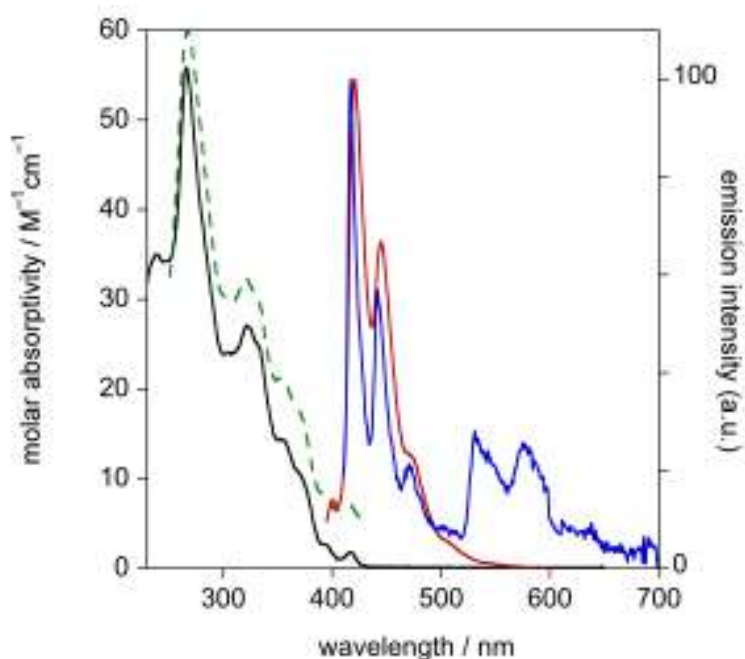

**Figure S16.** Spectra of **1a**: absorption (black line), fluorescence emission (red line) and fluorescence excitation (green dashed line) spectra at room temperature in  $\text{CH}_2\text{Cl}_2$ ; emission spectrum in diethyl ether / isopentane / ethanol (2:2:1 v/v) at 77 K (blue line).

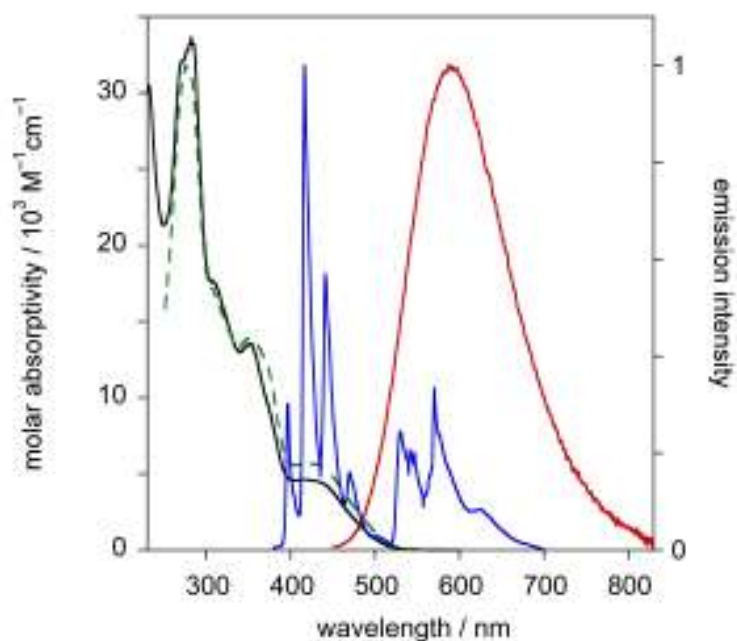

**Figure S17.** Spectra of  $[1a,2H^+][2BF_4^-]$ : absorption (black line), fluorescence emission (red line) and fluorescence excitation (green dashed line) spectra at room temperature in  $CH_2Cl_2$ ; emission spectrum in diethyl ether / isopentane / ethanol (2:2:1 v/v) at 77 K (blue line).

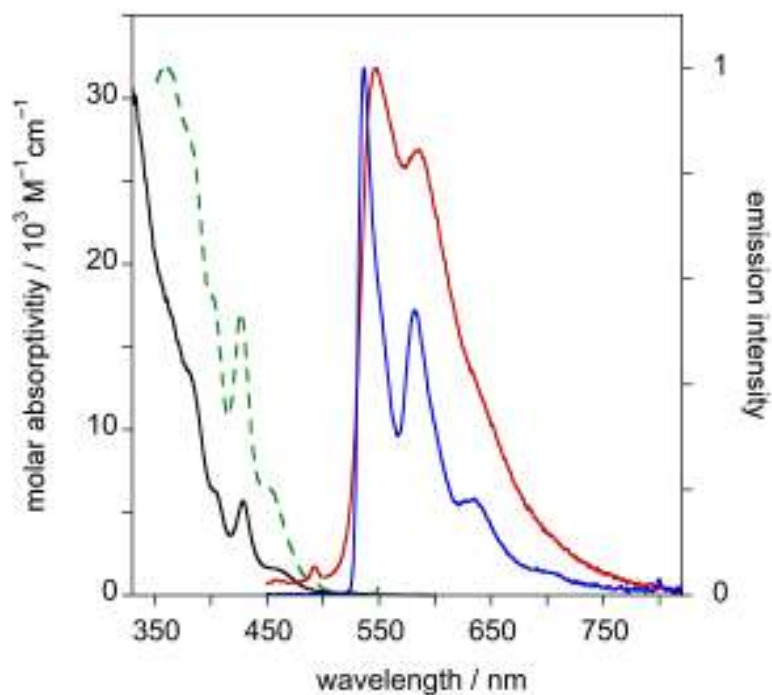

**Figure S18.** Spectra of **2a**: absorption (black line), emission (red line) and excitation (dashed green line) spectra in acetone at room temperature; emission spectrum in diethyl ether / isopentane / ethanol (2:2:1 v/v) at 77 K (blue line).

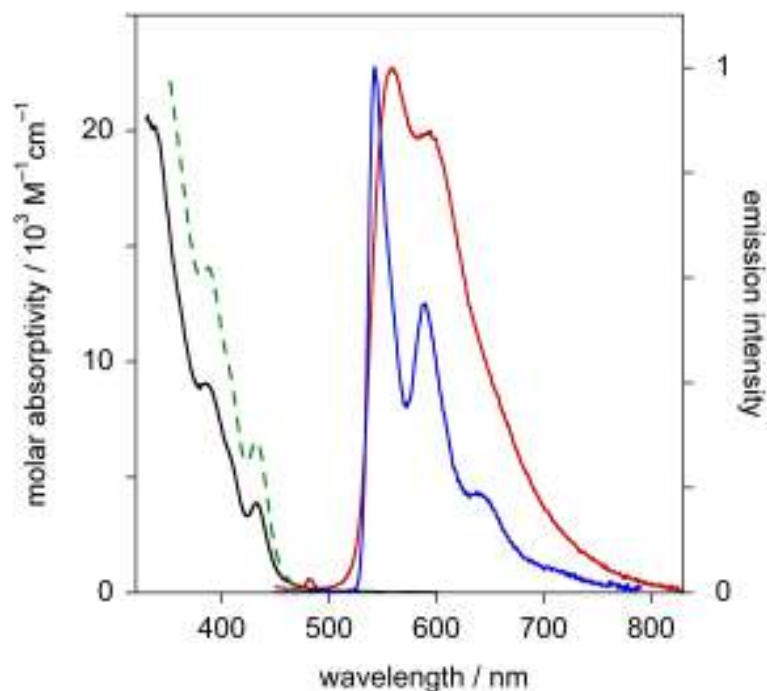

**Figure S19.** Spectra of  $[2a, H^+][BF_4^-]$ : absorption (black line), emission (red line) and excitation (dashed green line) spectra in acetone at room temperature; emission spectrum in diethyl ether / isopentane / ethanol (2:2:1 v/v) at 77 K (blue line).

**Table S3** Summary of absorption and non-polarised photoluminescence data.

| Compound                                                               | Absorption<br>$\lambda_{max} / nm (\epsilon / M^{-1}cm^{-1})$                           | Emission<br>$\lambda_{max} / nm$ | $\Phi^{(c)}$ | $\tau / ns^{(c)}$ | Emission 77K <sup>(d)</sup>                                               |                 |
|------------------------------------------------------------------------|-----------------------------------------------------------------------------------------|----------------------------------|--------------|-------------------|---------------------------------------------------------------------------|-----------------|
|                                                                        |                                                                                         |                                  |              |                   | $\lambda_{max} / nm$                                                      | $\tau / ns$     |
| <b>1a<sup>(a)</sup></b>                                                | 240 (35000), 266 (55800), 322 (27000), 353 (14400), 372 (10200), 393 (2630), 417 (1800) | 421, 445, 473sh                  | 0.084        | 6.6 ns            | F = 417, 442, 471<br>P = 531, 577, 624                                    | 9.0 ns<br>1.3 s |
| <b>[1a, 2H<sup>+</sup>][2BF<sub>4</sub><sup>-</sup>]<sup>(a)</sup></b> | 282 (33700), 308sh (17600), 351 (13600), 418 (4630)                                     | 590                              | 0.082        | 5.4 ns            | F = 396, 416, 441, 470 <sup>(e)</sup><br>P = 530, 577, 621 <sup>(e)</sup> | 9.8 ns<br>1.4 s |
| <b>2a<sup>(b)</sup></b>                                                | 379sh (13600), 402sh (6340), 429 (5680), 458 (1590)                                     | 547, 585                         | 0.0038       | 18 $\mu$ s        | 536, 582, 635                                                             | 890 $\mu$ s     |
| <b>[2a, H<sup>+</sup>][BF<sub>4</sub><sup>-</sup>]<sup>(b)</sup></b>   | 385 (9060), 432 (3890)                                                                  | 555, 590                         | 0.027        | 120 $\mu$ s       | 542, 589, 640 <sup>(e)</sup>                                              | 720 $\mu$ s     |

(a) In dichloromethane at  $298 \pm 3K$ , except where indicated otherwise. (b) In acetone at  $298 \pm 3K$  except where indicated otherwise (note that absorption maxima  $< 330$  nm are not measurable in acetone, due to the solvent absorption). (c) In degassed solution. (d) Data at 77 K recorded in diethyl ether / isopentane / ethanol (2:2:1 v/v). (e) Note that at 77 K the equilibrium  $B+H^+ \rightleftharpoons BH^+$  is frozen.

---

## CPL measurements

The circularly polarized luminescence (CPL) and total luminescence spectra were recorded on an instrument described previously,<sup>1</sup> operating in a differential photon-counting mode. The light source for excitation was a continuous wave 1000 W xenon arc lamp from a Spex Fluorolog-2 spectrofluorimeter, equipped with excitation and emission monochromators with dispersion of 4 nm/mm (SPEX, 1681B). To prevent artifacts associated with the presence of linear polarization in the emission,<sup>2</sup> a high quality linear polarizer was placed in the sample compartment, and aligned so that the excitation beam was linearly polarized in the direction of emission detection (z-axis). The key feature of this geometry is that it ensures that the molecules that have been excited and that are subsequently emitting are isotropically distributed in the plane (x,y) perpendicular to the direction of emission detection. The optical system detection consisted of a focusing lens, long pass filter, and 0.22 m monochromator. The emitted light was detected by a cooled EMI-9558B photomultiplier tube operating in photo-counting mode. All measurements were performed with quartz cuvettes with a path length of 1.0 cm.

## References

<sup>1</sup> Brunet, E.; Jiménez, L.; de Victoria-Rodríguez, M.; Luu, V.; Muller, G.; Juanes, O.; Rodríguez-Ubis, J.C. *Microporous and Mesoporous Mater.*, **2013**, *169*, 222, and references therein.

<sup>2</sup> Dekkers, H. P. J. M.; Moraal, P. F.; Timper, J. M.; Riehl, J. P. *Appl. Spectrosc.* **1985**, *39*, 818.

---

## Computational Details

Optimized geometries of *P*-**1a**, *P*-[**1a**,2H<sup>+</sup>], *P*-**2a**, and *P*-[**2a**,H<sup>+</sup>] were obtained using the Turbomole program<sup>1</sup> version 6.5, with the Becke-Perdew (BP) density functional<sup>2-4</sup> and a split-valence basis SV(P),<sup>5</sup> which includes polarization functions for non-hydrogen atoms. A 60 electron effective-core potential (ECP) was employed for platinum.<sup>6</sup> The basis set / ECP definition is available at the EMSL basis set exchange.<sup>7,8</sup>

The sodium-D line ( $\lambda = 589.3$  nm) optical rotations (ORs) and electronic circular dichroism (ECD) spectra were calculated with the BHLYP<sup>9,10</sup> functional and the same basis set and ECP as aforementioned using the Turbomole TDDFT module. All CD calculations covered the 100 lowest singlet excited states (S1 to S100) for each system. The simulated spectra shown are the sums of Gaussian functions centered at the vertical excitation energies and scaled using the calculated rotatory strengths, with a parameter of  $\sigma = 0.2$  eV applied for the root mean square width. Electronic emission spectra via S<sub>1</sub> and T<sub>1</sub> excited-states geometry optimizations were obtained using the Gaussian 09 program<sup>11</sup> with BHLYP/SV(P). In the case of triplet states calculations, the Tamm-Dancoff approximation (TDA)<sup>12-17</sup> was applied, as full TDDFT results were found to be unreliable.

Some benchmark CD computations employed a functional with range-separated exchange, LC-wPBE,<sup>18-20</sup> and were carried out using the Gaussian 09 program. CD calculations were additionally carried out using a range-separated exchange functional based on LC-PBE0<sup>21,22</sup> optimally tuned for a helicene, using a developers version of NWChem<sup>23</sup> with the same basis set. The motivation and background of optimal tuning is well established in the literature.<sup>24-38</sup> An optimal range-separation parameter  $\gamma$  (0.143 a<sub>0</sub><sup>-1</sup>) was taken from previous work by the authors on optical rotation of helicene derivatives.<sup>30</sup> There is an appearance of new low-energy CD bands upon protonation of **1a** and **2a** which are shown below to have a significantly increased charge-transfer character compared to the lowest-energy excitations of the non-protonated species. The excellent agreement of BHLYP with the LC calculations establishes that BHLYP, which reproduces the experimental spectra well, does not suffer from a charge-transfer breakdown in the TDDFT calculations.

Solvent effects (dichloromethane, DCM,  $\epsilon = 8.9$ ; acetone,  $\epsilon = 20.7$ ) were included in the calculations in order to improve the correspondence with experimental results. This was found to be particularly important in the case of the protonated ligand species, for which gas-phase TDDFT results were found to be clearly deficient.<sup>39</sup> The conductor-like screening model (COSMO)<sup>40-42</sup> and polarizable continuum model (PCM)<sup>42-45</sup> with default parameters were employed in Turbomole and Gaussian, respectively.

Counter-ion (BF<sub>4</sub><sup>-</sup>) effects were considered for both protonated species, *P*-[**1a**,2H<sup>+</sup>] and *P*-[**2a**,H<sup>+</sup>], since the presence of a counter-ion may affect the calculated chiroptical properties. For this purpose, the BF<sub>4</sub><sup>-</sup> was placed near the protonated nitrogen, and the geometry was optimized with use of a continuum solvent model. The counter-ions had the strongest effect on the protonated **1a** ligand, which additionally reveals high conformational flexibility. The reader is referred to Table S4 for preliminary OR data obtained for both protonated species in the presence of counter-ions, showing that coordination of the systems by solvent as well as the counter-ion(s) is likely responsible for the much smaller experimentally determined ORs in comparison to the calculations with just the continuum solvent model. Figure S22 shows the corresponding CD spectra, indicating an improvement for *P*-[**1a**,2H<sup>+</sup>] and relatively minor, but noticeable, changes for *P*-[**2a**,H<sup>+</sup>]. In a follow-up study we will investigate explicit solvent effects and counter-ion effects in detail using *ab-initio* molecular dynamics (aiMD). Due to the very high computational effort of aiMD-based



averaging of optical properties and spectra, and due to the fact that the CD and CPL spectra and not the ORs are the main focus of the present report, such calculations are beyond the scope of this Manuscript.

**Table S4.** Calculated optical rotations for cycloplatinated complexes *P-2a* and *P-[2a,H<sup>+</sup>]*, and the pristine ligand species *P-1a* and *P-[1a,2H<sup>+</sup>]*, along with experimental data. <sup>a</sup>

| System                                 | # / $\Delta E$ | $\angle$<br>N-C-C'-N' | Calc. BHLYP/SV(P) |            | Expt.        |            |
|----------------------------------------|----------------|-----------------------|-------------------|------------|--------------|------------|
|                                        |                |                       | $[\alpha]_D$      | $[\phi]_D$ | $[\alpha]_D$ | $[\phi]_D$ |
| <b>1a</b>                              | ---            | 179.7                 | 3487              | 14176      | 2955         | 12000      |
| <b>[1a,2H<sup>+</sup>]<sup>b</sup></b> | 1 / 0.00       | -150.0                | 8835              | 36092      | 1700         | 10000      |
|                                        | 2 / 0.35       | 151.0                 | 9147              | 37367      |              |            |
|                                        | 3 / 0.94       | -178.2                | 11984             | 48953      |              |            |
| <b>2a</b>                              | ---            | ---                   | 2789              | 19345      | 2700         | 18730      |
| <b>[2a,H<sup>+</sup>]<sup>b</sup></b>  | ---            | ---                   | 3486              | 24217      | 1170         | 9145       |

<sup>a</sup> Dichloromethane (DCM,  $\epsilon = 8.9$ ) solution. '#' numbers different conformers. BP/SV(P) relative energy  $\Delta E$  given in kcal/mol, dihedral angle N-C-C'-N' (compare Figure S20) in degree, specific rotations and molar rotations in degree/(dm g/cm<sup>-3</sup>) and degree cm<sup>2</sup>/dmol, respectively. <sup>b</sup> Calculations performed with an optimized structure of **[1a,2H<sup>+</sup>][2BF<sub>4</sub><sup>-</sup>]** resulted in strongly decreased OR values: 3687 and 21463 for specific and molar rotation, respectively. Similar calculations for two different optimized **[2a,H<sup>+</sup>][BF<sub>4</sub><sup>-</sup>]** structures yielded 2886/2843 and 22553/22222 for specific and molar rotation, respectively. Compare Figure S21.

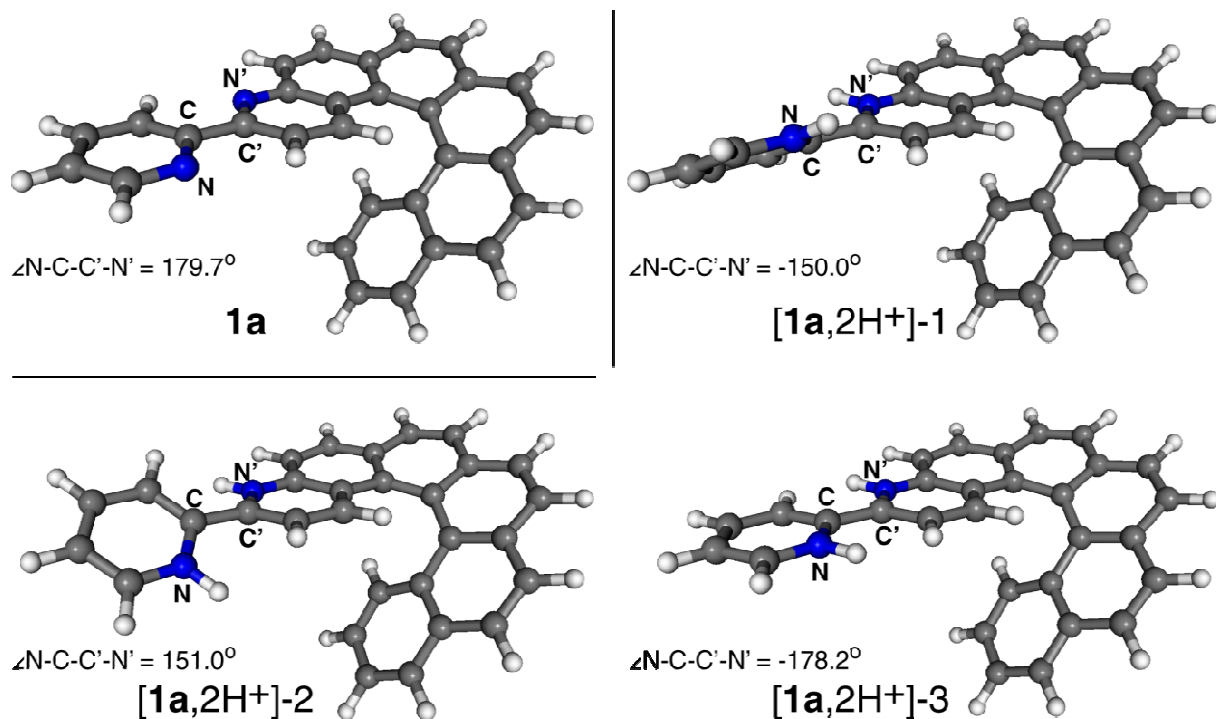

**Figure S20.** Selected low-energy optimized structures of ligand species *P*-**1a** and *P*-**[1a,2H<sup>+</sup>]**. BP/SV(P) DCM calculations.

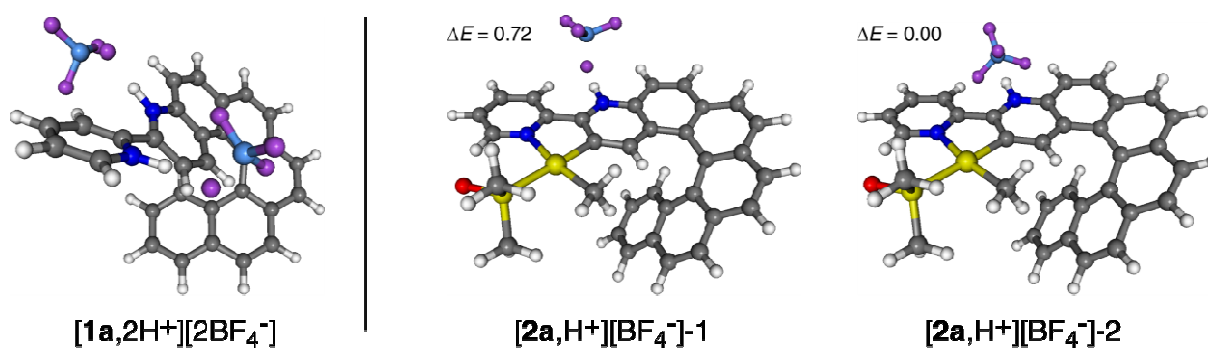

**Figure S21.** Optimized structures of protonated species. BP/SV(P) DCM calculations. Relative energies,  $\Delta E$ , given in kcal/mol.

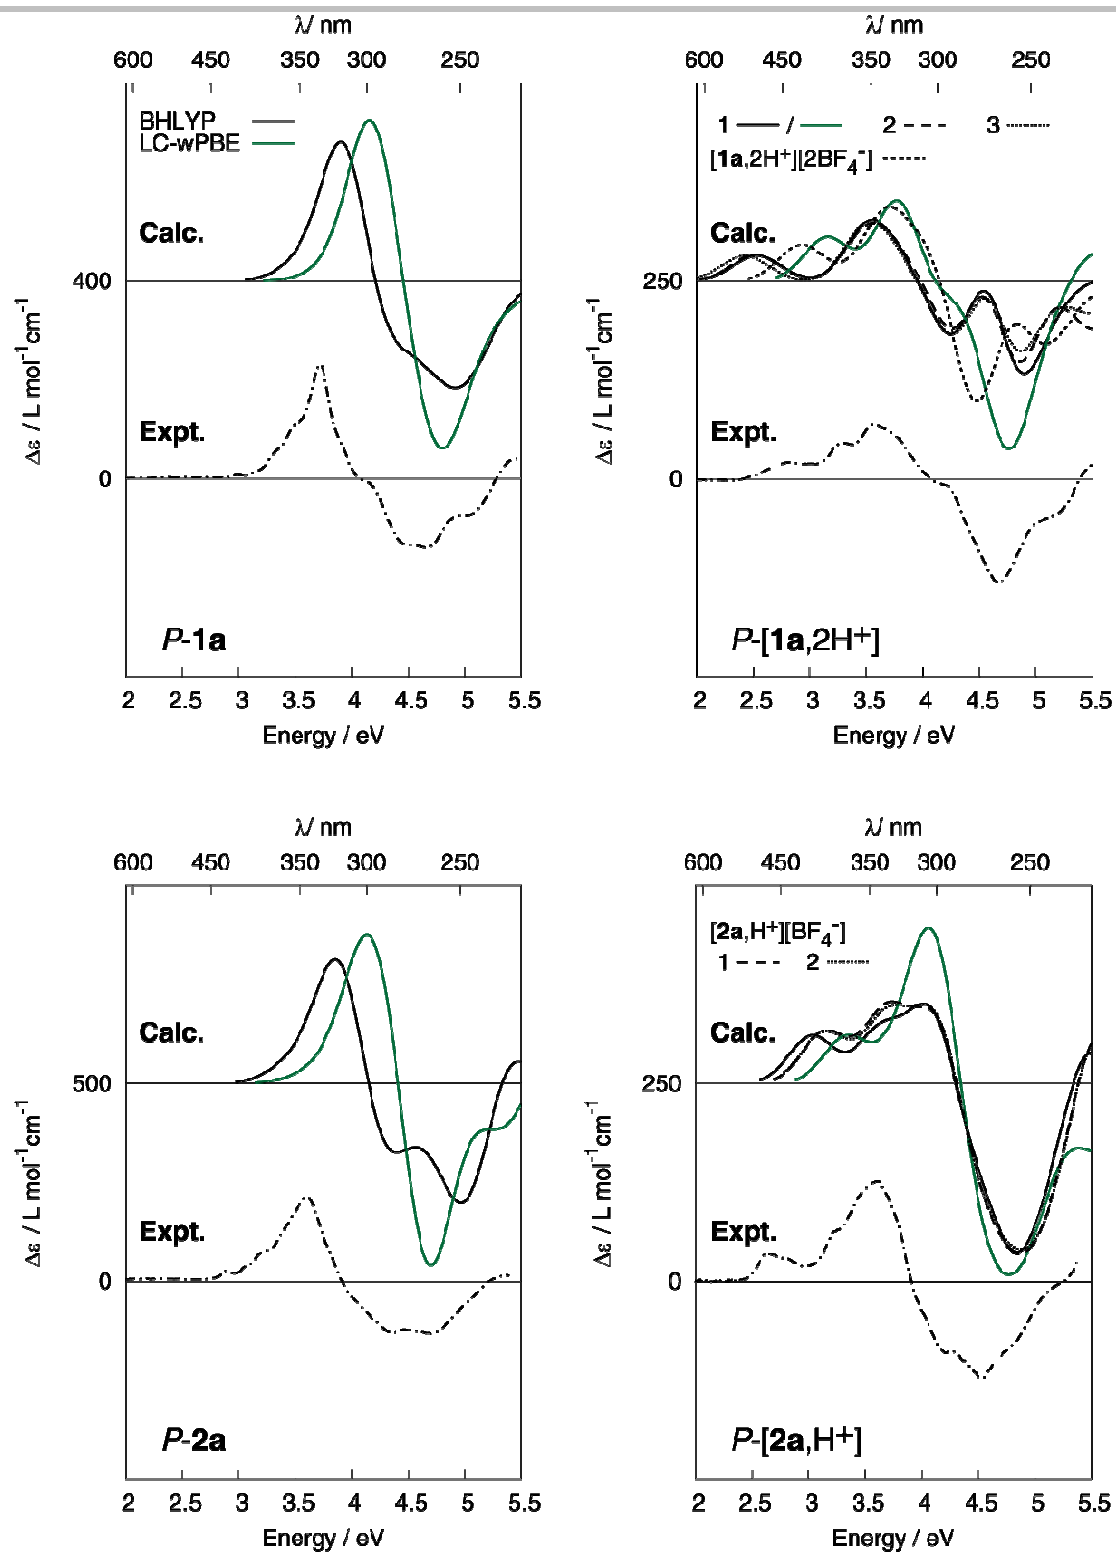

**Figure S22.** Comparison of experimental and calculated TDDFT CD spectra of ligand species *P-1a* and *P-[1a,2H<sup>+</sup>]* (top) and cycloplatinated complexes *P-2a* and *P-[2a,H<sup>+</sup>]* (bottom). No spectral shift has been applied. DCM solvent. Numbers listed (1, 2, 3) correspond to different conformers examined (compare Figure S20 in the case of **[1a,2H<sup>+</sup>]** and Figure S21 in the case of **[2a,H<sup>+</sup>][BF<sub>4</sub><sup>-</sup>]**).

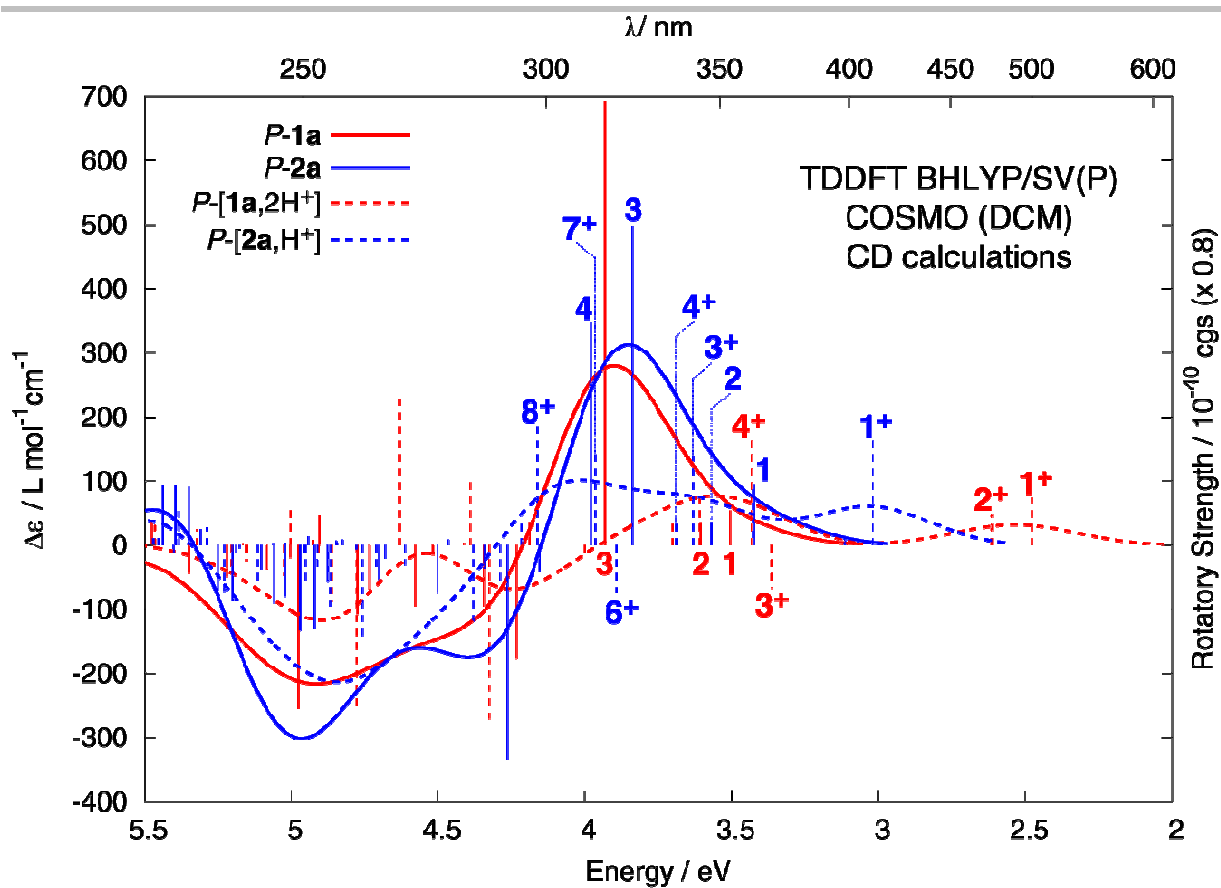

**Figure S23.** Comparison of the calculated BHLYP CD spectra of ligand species *P-1a* (red solid line) and *P-[1a,2H<sup>+</sup>]*-1 (red dashed line) and cycloplatinated complexes *P-2a* (blue solid line) and *P-[2a,H<sup>+</sup>]* (blue dashed line). No spectral shifts have been applied. Numbered excitations correspond to those analyzed in detail.

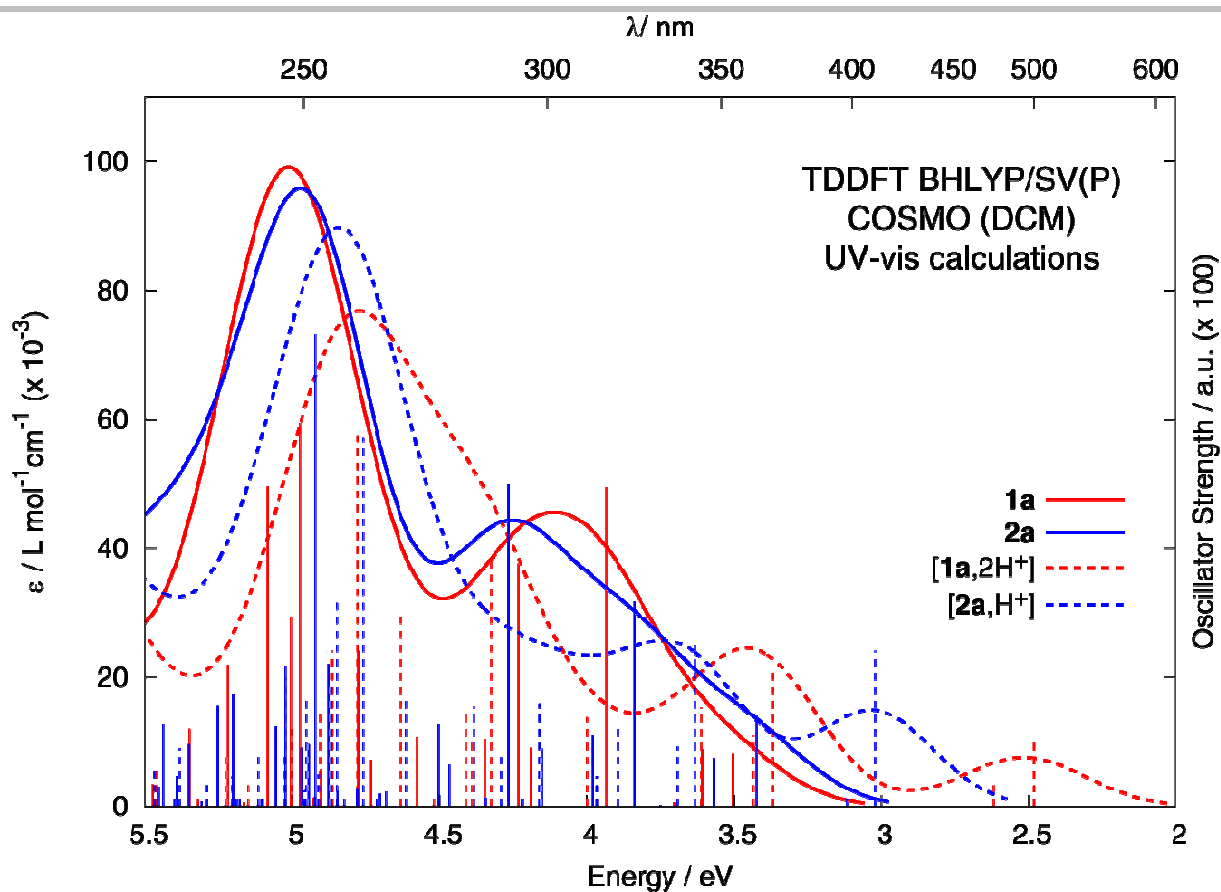

**Figure S24.** Comparison of the calculated BHLYP UV-vis spectra of ligand species *P*-**1a** (red solid line) and *P*-[**1a**,2H<sup>+</sup>]-1 (red dashed line) and cycloplatinated complexes *P*-**2a** (blue solid line) and *P*-[**2a**,H<sup>+</sup>] (blue dashed line). No spectral shifts have been applied.

**Table S5.** Selected dominant excitations and occupied (occ) – unoccupied (unocc) MO pair contributions (greater than 10%) of *P-1a* and *P-[1a,2H<sup>+</sup>]-1* ligand species. BHLYP/SV(P) DCM calculations.

| Excitation                   | <i>E</i> / eV | $\lambda$ / nm | <i>f</i> / au | <i>R</i> / 10 <sup>-40</sup> cgs | occ no. | unocc no. | %    |
|------------------------------|---------------|----------------|---------------|----------------------------------|---------|-----------|------|
| <b>1a</b>                    |               |                |               |                                  |         |           |      |
| #1                           | 3.50          | 354            | 0.0813        | 67.86                            | 106     | 107       | 33.0 |
|                              |               |                |               |                                  | 105     | 107       | 31.1 |
|                              |               |                |               |                                  | 106     | 108       | 17.2 |
| #2                           | 3.61          | 344            | 0.0885        | 43.93                            | 106     | 107       | 44.1 |
|                              |               |                |               |                                  | 105     | 107       | 22.5 |
|                              |               |                |               |                                  | 106     | 108       | 16.4 |
| #3                           | 3.93          | 315            | 0.4944        | 865.51                           | 105     | 108       | 35.1 |
|                              |               |                |               |                                  | 106     | 108       | 28.1 |
|                              |               |                |               |                                  | 105     | 107       | 15.5 |
| <b>[1a,2H<sup>+</sup>]-1</b> |               |                |               |                                  |         |           |      |
| #1 <sup>+</sup>              | 2.48          | 500            | 0.1000        | 92.13                            | 106     | 107       | 91.7 |
| #2 <sup>+</sup>              | 2.62          | 474            | 0.0392        | 60.23                            | 105     | 107       | 85.7 |
| #3 <sup>+</sup>              | 3.37          | 368            | 0.2177        | -83.96                           | 104     | 107       | 76.6 |
| #4 <sup>+</sup>              | 3.43          | 361            | 0.1105        | 211.81                           | 106     | 108       | 52.9 |
|                              |               |                |               |                                  | 106     | 109       | 18.7 |

**Table S6.** Selected dominant excitations and occupied (occ) – unoccupied (unocc) MO pair contributions (greater than 10%) of *P-2a* and *P-[2a,H<sup>+</sup>]* cycloplatinated species. BHLYP/SV(P) DCM calculations.

| Excitation                | <i>E</i> / eV | $\lambda$ / nm | <i>f</i> / au | <i>R</i> / 10 <sup>-40</sup> cgs | occ no. | unocc no. | %    |
|---------------------------|---------------|----------------|---------------|----------------------------------|---------|-----------|------|
| <b>2a</b>                 |               |                |               |                                  |         |           |      |
| #1                        | 3.42          | 362            | 0.1397        | 118.97                           | 140     | 141       | 53.8 |
|                           |               |                |               |                                  | 139     | 141       | 17.4 |
|                           |               |                |               |                                  | 140     | 142       | 10.0 |
| #2                        | 3.57          | 347            | 0.0751        | 44.19                            | 139     | 141       | 39.2 |
|                           |               |                |               |                                  | 140     | 141       | 23.2 |
|                           |               |                |               |                                  | 140     | 142       | 17.4 |
| #3                        | 3.84          | 323            | 0.3178        | 624.08                           | 139     | 142       | 52.9 |
|                           |               |                |               |                                  | 138     | 141       | 10.3 |
| #4                        | 3.98          | 311            | 0.1107        | 434.60                           | 139     | 142       | 27.3 |
|                           |               |                |               |                                  | 138     | 141       | 21.8 |
|                           |               |                |               |                                  | 140     | 142       | 10.9 |
| <b>[2a,H<sup>+</sup>]</b> |               |                |               |                                  |         |           |      |
| #1 <sup>+</sup>           | 3.02          | 410            | 0.2411        | 209.98                           | 140     | 141       | 75.5 |
|                           |               |                |               |                                  | 139     | 141       | 10.2 |
| #3 <sup>+</sup>           | 3.63          | 341            | 0.2541        | 173.11                           | 138     | 141       | 45.9 |
|                           |               |                |               |                                  | 140     | 142       | 26.3 |
| #4 <sup>+</sup>           | 3.69          | 336            | 0.0923        | 53.93                            | 138     | 141       | 28.7 |
|                           |               |                |               |                                  | 139     | 142       | 22.7 |
|                           |               |                |               |                                  | 140     | 142       | 20.5 |
| #6 <sup>+</sup>           | 3.89          | 319            | 0.1209        | -91.83                           | 139     | 142       | 23.8 |
|                           |               |                |               |                                  | 140     | 142       | 19.9 |
|                           |               |                |               |                                  | 140     | 143       | 16.8 |
|                           |               |                |               |                                  | 136     | 141       | 15.9 |
| #7 <sup>+</sup>           | 3.97          | 313            | 0.0467        | 176.29                           | 136     | 141       | 47.5 |
|                           |               |                |               |                                  | 139     | 142       | 14.4 |
|                           |               |                |               |                                  | 139     | 143       | 13.5 |
| #8 <sup>+</sup>           | 4.16          | 298            | 0.1597        | 231.63                           | 140     | 143       | 50.7 |
|                           |               |                |               |                                  | 139     | 142       | 15.6 |

**Table S7.** Calculated  $S_0$  frontier molecular orbitals energies and HOMO-LUMO gaps ( $\Delta E$ ), in eV, at  $S_0^{\{DFT\}}$ ,  $S_1^{\{TDDFT\}}$ , and  $T_1^{\{TDDFT\}}$  geometries calculated with BHLYP/SV(P) DCM. <sup>a</sup>

|                                | HOMO  | LUMO  | $\Delta E$ |
|--------------------------------|-------|-------|------------|
| $S_0^{\{DFT\}}$                |       |       |            |
| <i>P-1a</i>                    | -6.66 | -1.25 | 5.41       |
| <i>P-[1a,2H<sup>+</sup>]-1</i> | -7.67 | -3.82 | 3.85       |
| <i>P-2a</i>                    | -6.53 | -1.22 | 5.31       |
| <i>P-[2a,H<sup>+</sup>]</i>    | -7.17 | -2.62 | 4.54       |
| $S_1^{\{TDDFT\}}$              |       |       |            |
| <i>P-1a</i>                    | -6.31 | -1.45 | 4.86       |
| <i>P-[1a,2H<sup>+</sup>]-1</i> | -7.48 | -4.19 | 3.30       |
| <i>P-[1a,2H<sup>+</sup>]-2</i> | -7.48 | -4.19 | 3.29       |
| <i>P-2a</i>                    | -6.22 | -1.43 | 4.80       |
| <i>P-[2a,H<sup>+</sup>]</i>    | -6.96 | -2.77 | 4.18       |
| $T_1^{\{TDDFT\}}$              |       |       |            |
| <i>P-1a</i>                    | -6.38 | -1.38 | 5.00       |
| <i>P-[1a,2H<sup>+</sup>]-1</i> | -7.52 | -4.17 | 3.35       |
| <i>P-[1a,2H<sup>+</sup>]-2</i> | -7.53 | -4.16 | 3.36       |
| <i>P-2a</i>                    | -6.27 | -1.35 | 4.92       |
| <i>P-[2a,H<sup>+</sup>]</i>    | -6.99 | -2.70 | 4.29       |

<sup>a</sup> The corresponding acetone data appeared to be very similar and therefore they are not shown.

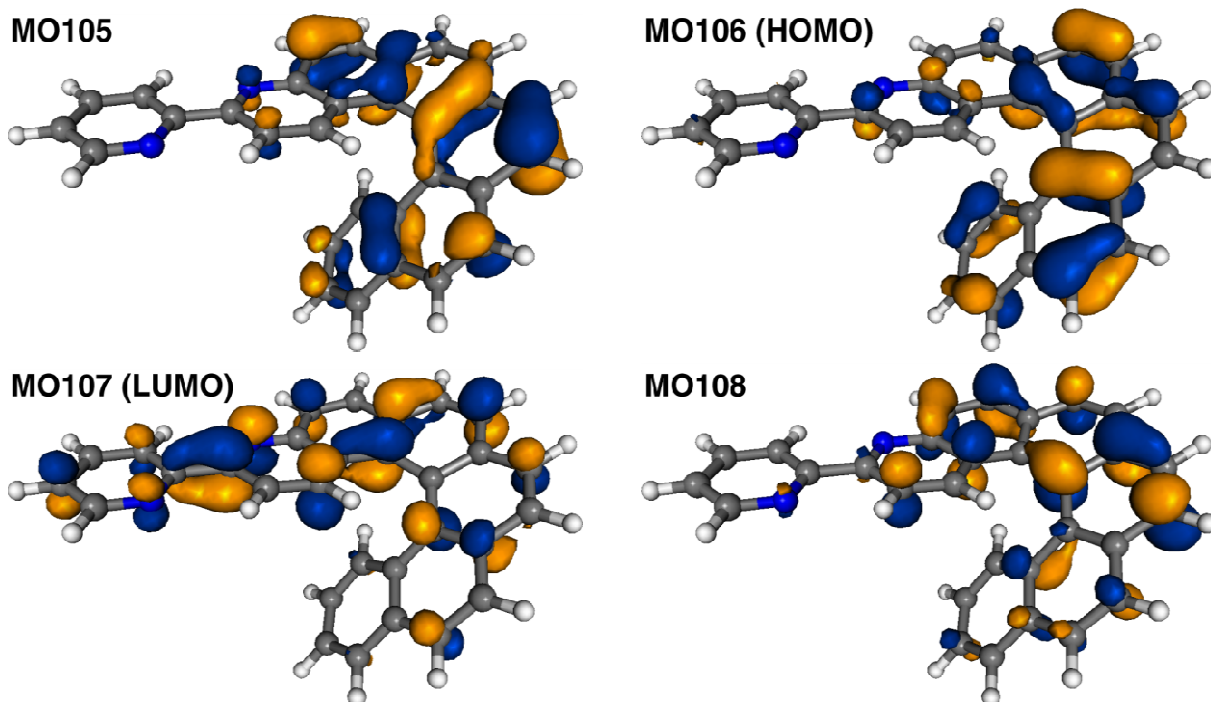



Figure S25. Isosurfaces (0.04 au) of selected MOs of **1a**.

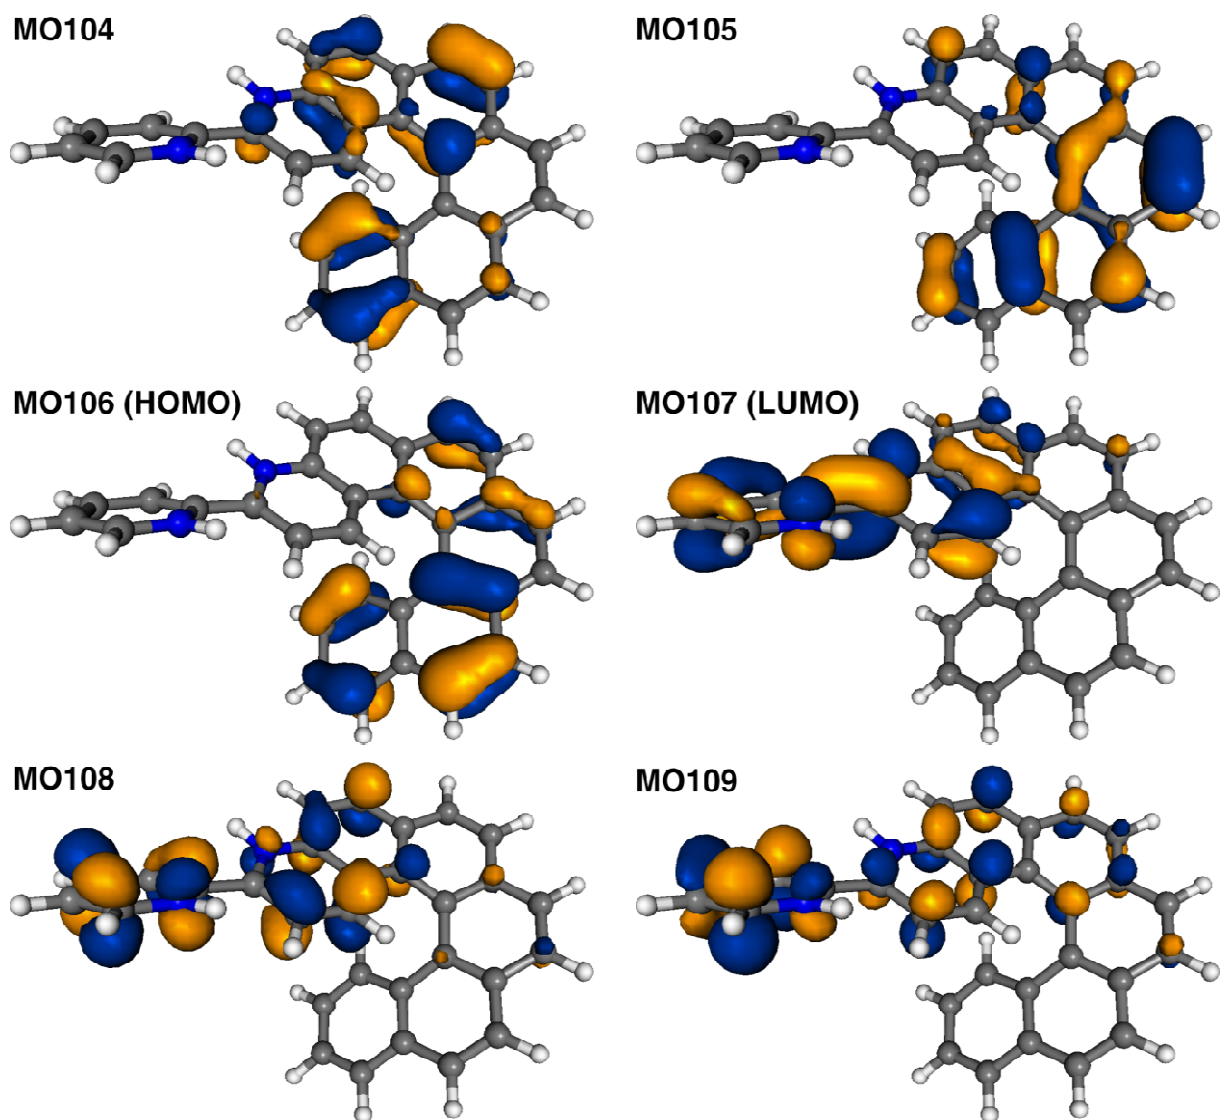

Figure S26. Isosurfaces (0.04 au) of selected MOs of  $[\mathbf{1a}, 2\text{H}^+]-1$ .

MO138

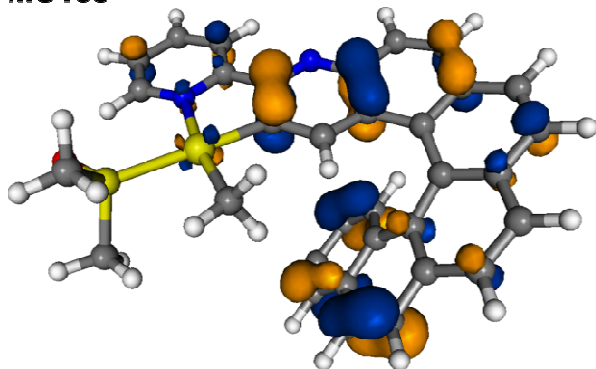

MO139

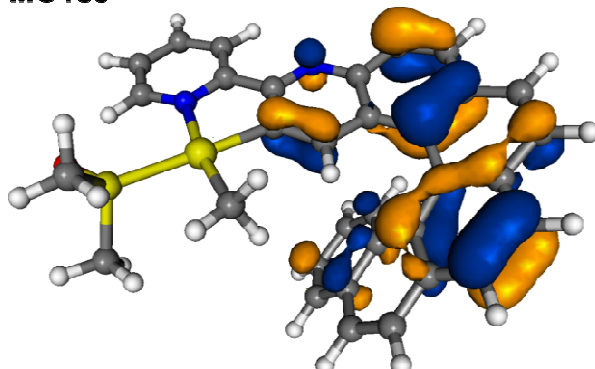

MO140 (HOMO)

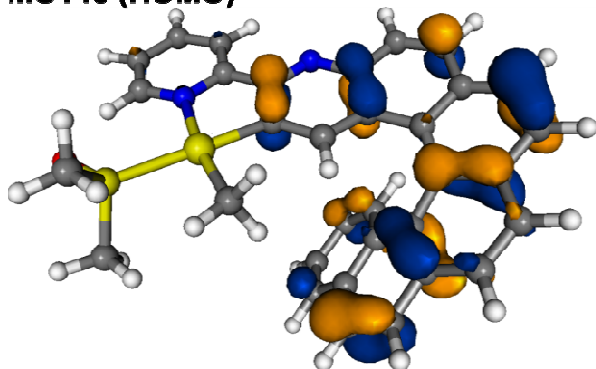

MO141 (LUMO)

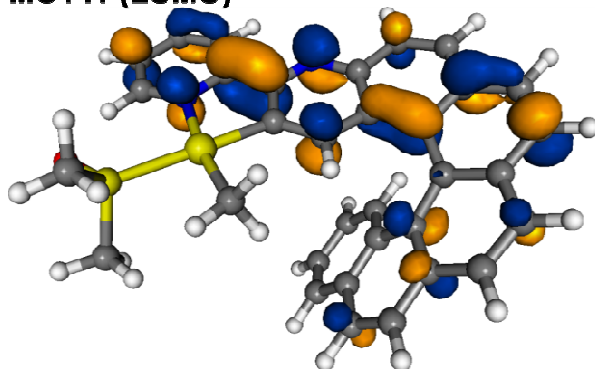

MO142

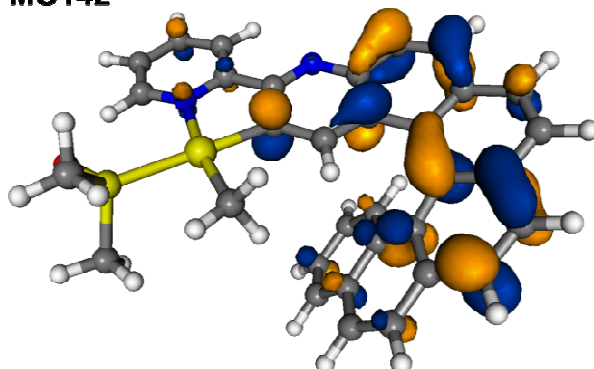

Figure S27. Isosurfaces (0.04 au) of selected MOs of 2a.

MO136

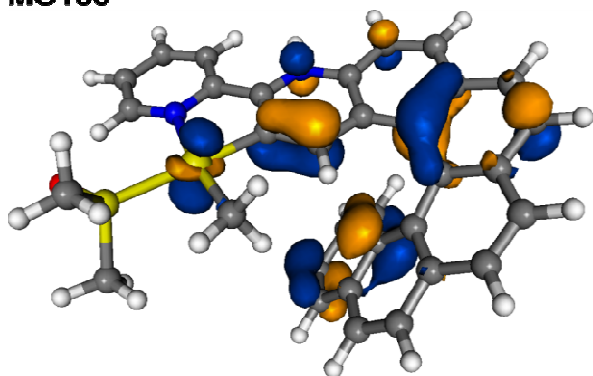

MO138

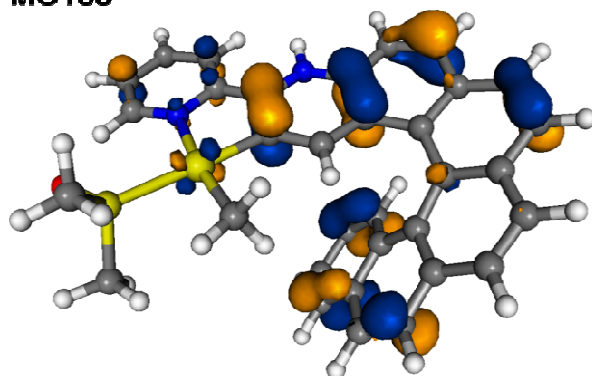

MO139

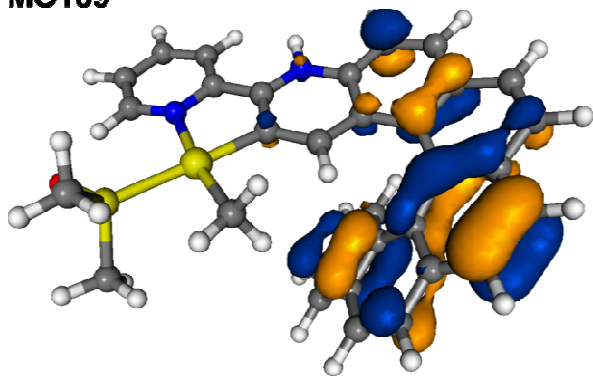

MO140 (HOMO)

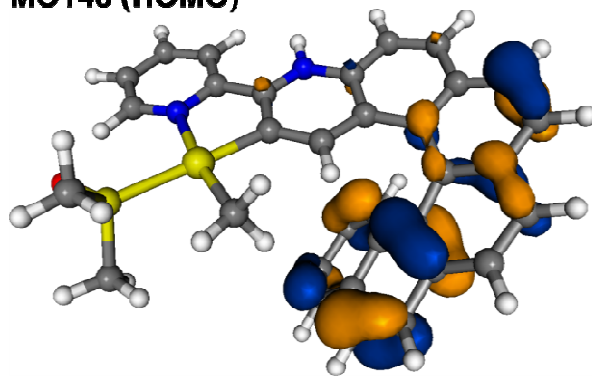

MO141 (LUMO)

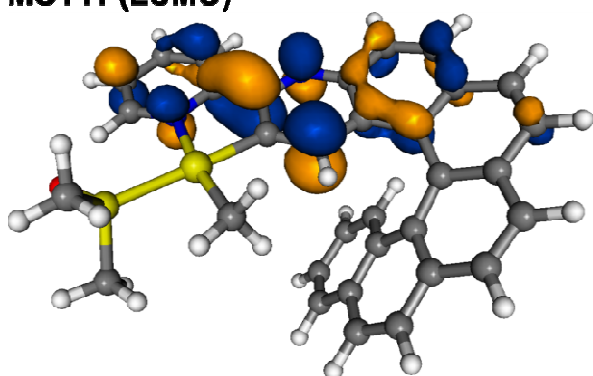

MO142

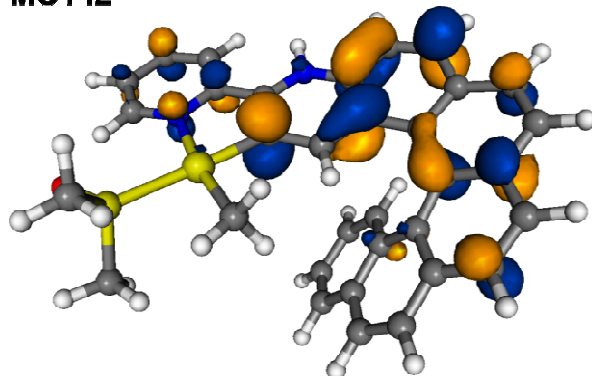

MO143

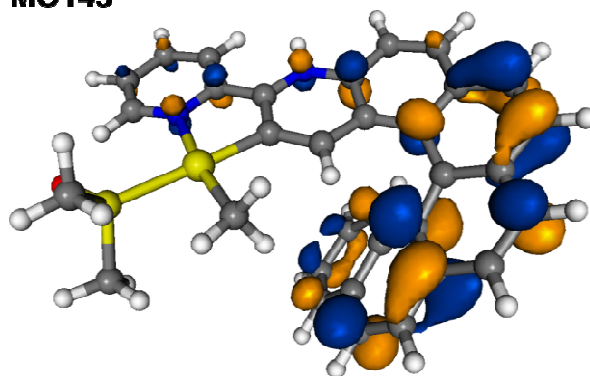

Figure S28. Isosurfaces (0.04 au) of selected MOs of [2a,H<sup>+</sup>].

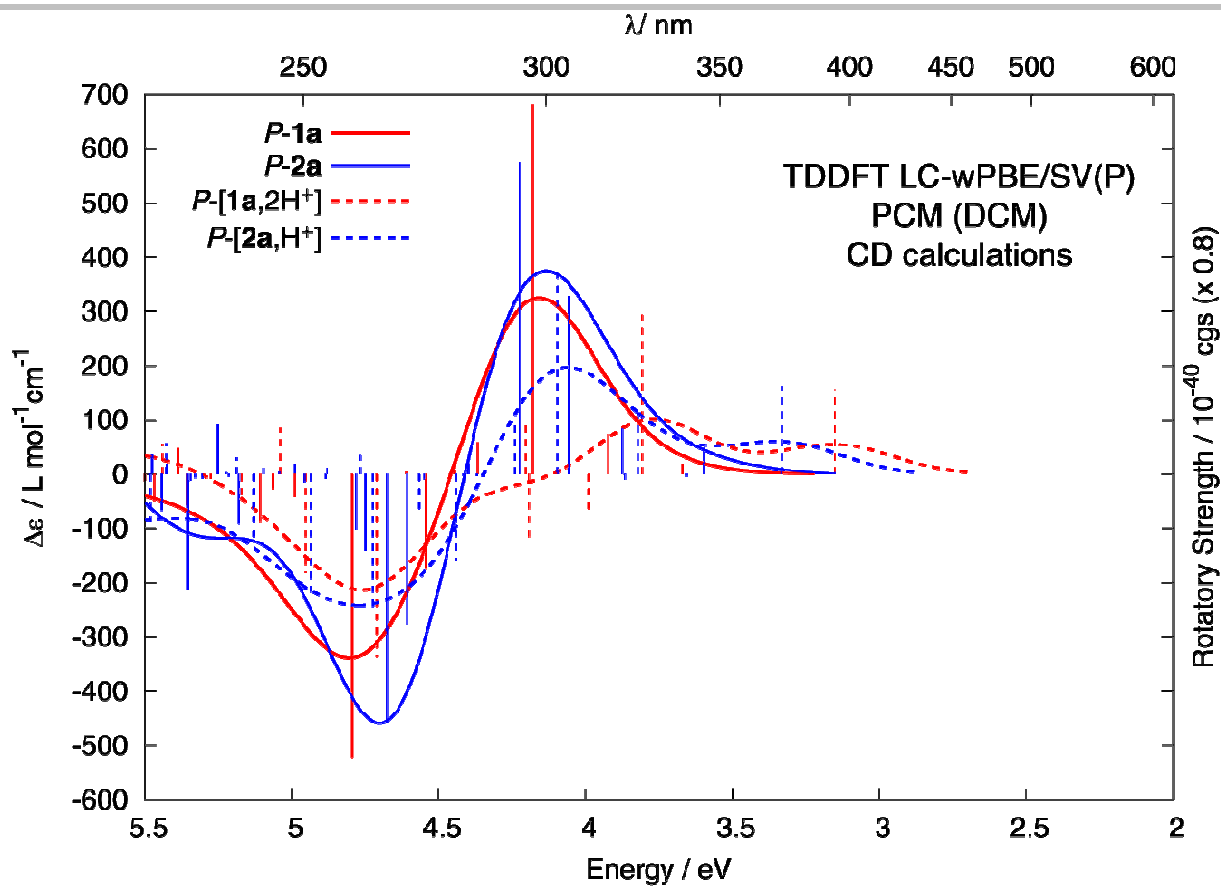

**Figure S29.** Comparison of the calculated LC-wPBE CD spectra of ligand species  $P-1a$  (red solid line) and  $P-[1a,2H^+]$  (red dashed line) and cycloplatinated complexes  $P-2a$  (blue solid line) and  $P-[2a,H^+]$  (blue dashed line). No spectral shifts have been applied.

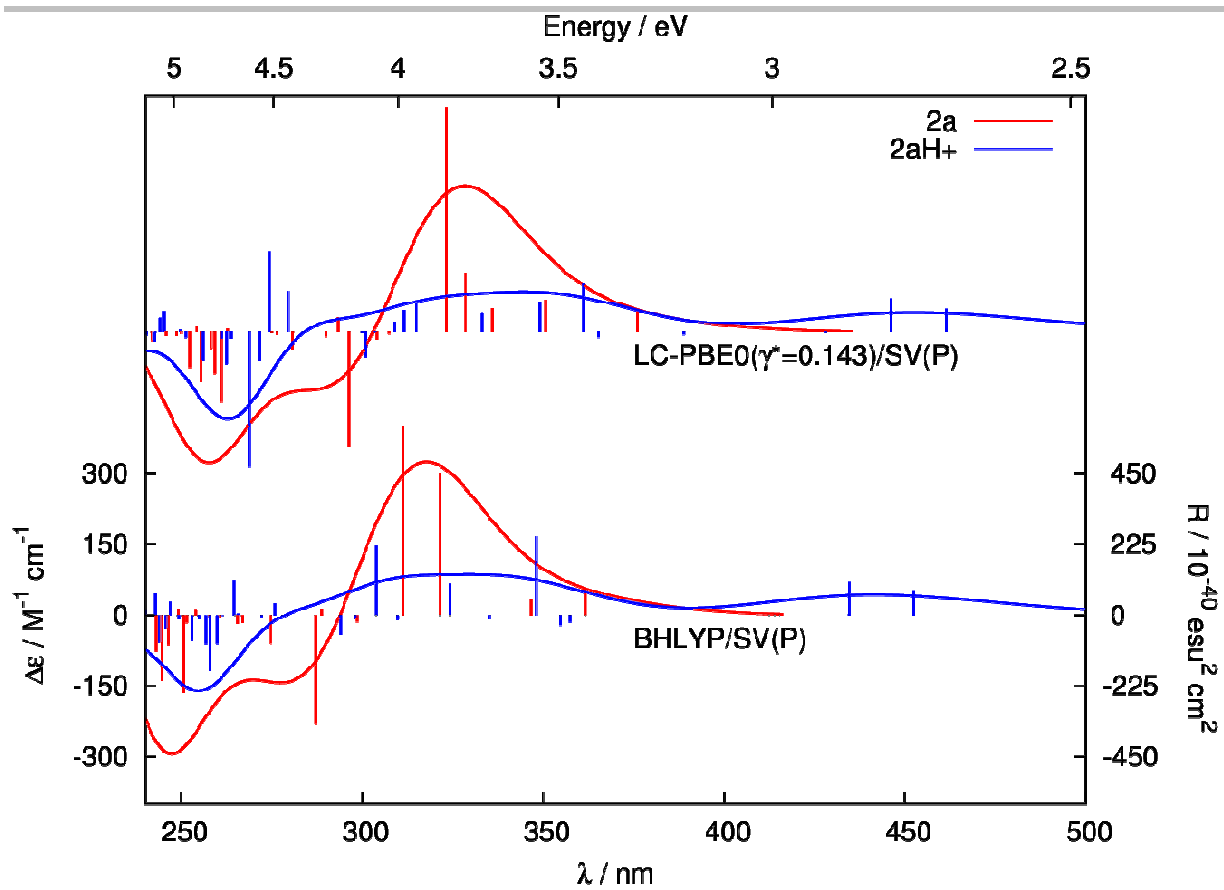

**Figure S30.** Comparison of calculated spectra of standard hybrid functional (BHLYP) and tuned range-separated hybrid functional (LC-PBE0\*) for *P*-**2a** (2a) and *P*-[**2a**,H<sup>+</sup>] (2aH<sup>+</sup>) in the gas phase.

**Table S8.** Experimental and calculated emission data of ligand species **1a** and [**1a**,2H<sup>+</sup>] and of cycloplatinated complexes **2a** and [**2a**,H<sup>+</sup>]. Energies, in eV.

|                                                       | <i>P</i> - <b>1a</b>    | <i>P</i> -[ <b>1a</b> ,2H <sup>+</sup> ]-# <sup>a</sup> |                         | <i>P</i> - <b>2a</b>    | <i>P</i> -[ <b>2a</b> ,H <sup>+</sup> ] |
|-------------------------------------------------------|-------------------------|---------------------------------------------------------|-------------------------|-------------------------|-----------------------------------------|
|                                                       |                         | 1                                                       | 2                       |                         |                                         |
| Expt. <sup>b</sup>                                    |                         |                                                         |                         |                         |                                         |
| 298 K                                                 | 2.94, 2.79, 2.62        | 2.10                                                    |                         | 2.27, 2.12              | 2.23, 2.10                              |
| 77 K                                                  | F: 2.97, 2.81,<br>2.63  | F: 3.13, 2.98, 2.81, 2.63 <sup>g</sup>                  |                         | 2.31, 2.13,<br>1.95     | 2.29, 2.10, 1.94 <sup>g</sup>           |
|                                                       | P: 2.33, 2.15,<br>1.99  | P: 2.34, 2.15, 2.00 <sup>g</sup>                        |                         |                         |                                         |
| Calc. BHLYP/SV(P) <sup>c</sup>                        |                         |                                                         |                         |                         |                                         |
| <i>S</i> <sub>1</sub> <sup>{TDDFT}</sup> <sup>d</sup> | 2.99<br>(0.4642/427.88) | 1.86<br>(0.1631/174.24)                                 | 1.87<br>(0.1741/194.33) | 2.94<br>(0.5507/459.99) | 2.66<br>(0.3444/268.69)                 |
| <i>T</i> <sub>1</sub> <sup>{TDDFT}</sup> <sup>e</sup> | 2.18                    | 1.49                                                    | 1.50                    | 2.16                    | 2.08                                    |
| <i>T</i> <sub>1</sub> <sup>{DFT}</sup> <sup>f</sup>   | 2.08                    | 1.60                                                    | 1.61                    | 2.06                    | 2.08                                    |

<sup>a</sup> Conformer #1: dihedral angle N-C-C'-N' of -150.0°, -170.5°, -175.7°, and -170.9° for *S*<sub>0</sub> ground state, *S*<sub>1</sub> excited state, *T*<sub>1</sub> excited state, and triplet configuration, respectively. Conformer #2: dihedral angle N-C-C'-N' of 151.0°, 171.5°, 172.2°, and 168.7° for *S*<sub>0</sub> ground state, *S*<sub>1</sub> excited state, *T*<sub>1</sub> excited state, and triplet configuration, respectively. <sup>b</sup> 298 K: DCM / acetone data for ligand / cycloplatinated species, 77 K: recorded in diethyl ether / isopentane / ethanol. F = fluorescence. P = phosphorescence. <sup>c</sup> DCM /acetone calculations for ligand / cycloplatinated species. <sup>d</sup> TDDFT *S*<sub>1</sub>-*S*<sub>0</sub> energy difference at TDDFT BHLYP/SV(P) optimized *S*<sub>1</sub> geometry. In parentheses oscillator strength / rotatory strength values in 10<sup>-40</sup> cgs are listed. To convert to integrated CPL intensity, in cgs units of power output per molecule, the following expression can be used:  $\Delta I = 1.60041320 \cdot 10^{37} \cdot R_{\text{cgs}} \cdot E_{\text{cgs}}^4$ . <sup>e</sup> TDDFT *T*<sub>1</sub>-*S*<sub>0</sub> energy difference at TDDFT BHLYP/SV(P) optimized *T*<sub>1</sub> geometry. <sup>f</sup> TDDFT *T*<sub>1</sub>-*S*<sub>0</sub> energy difference at DFT BP/SV(P) optimized triplet configuration. <sup>g</sup> At 77K, the equilibrium B+H<sup>+</sup> ⇌ BH<sup>+</sup> is frozen.

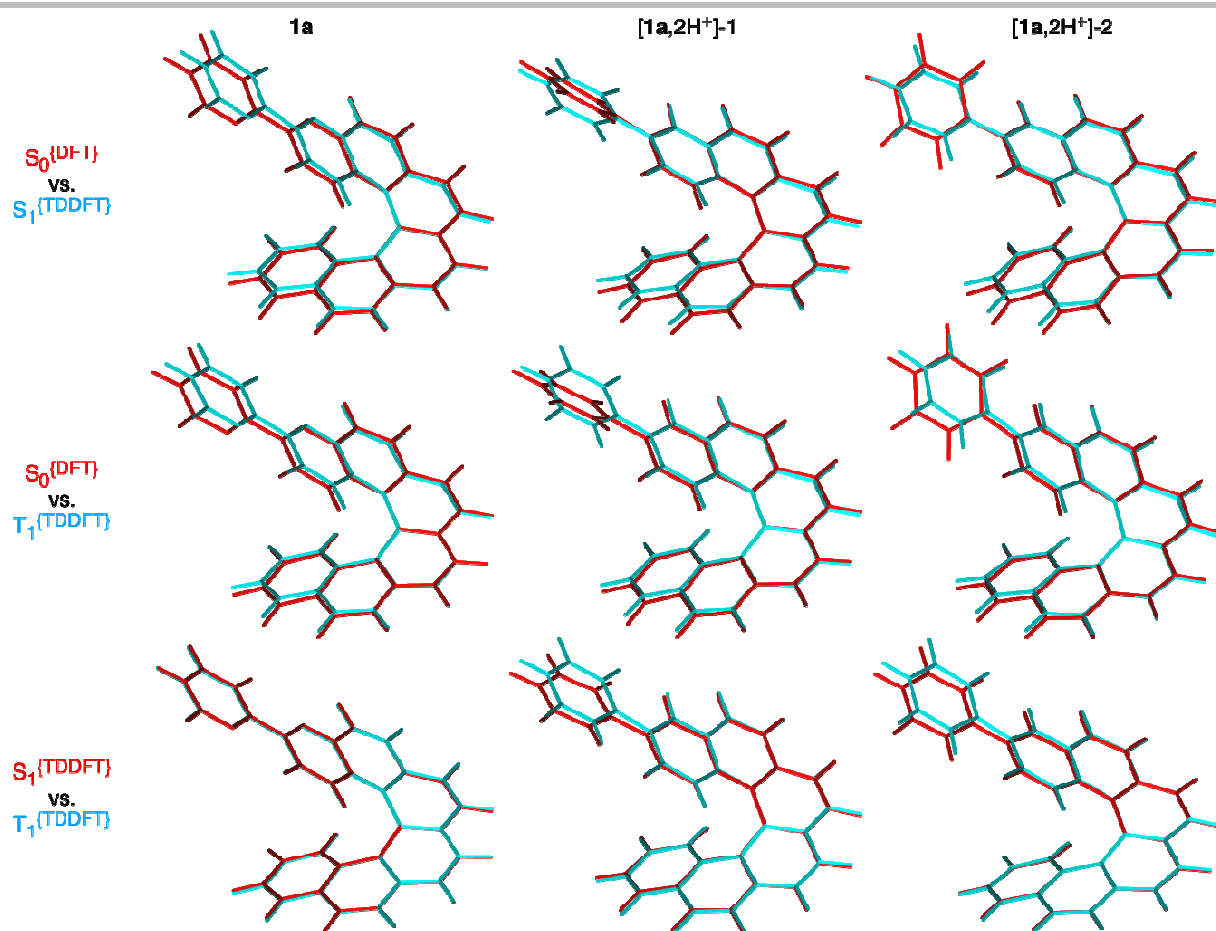

**Figure S31.** Overlays of optimized ground-state,  $S_0^{\{DFT\}}$  (BP/SV(P) DCM), and excited-states,  $S_1^{\{TDDFT\}}$  and  $T_1^{\{TDDFT\}}$  (BHLYP/SV(P) DCM), structures of the ligand species.

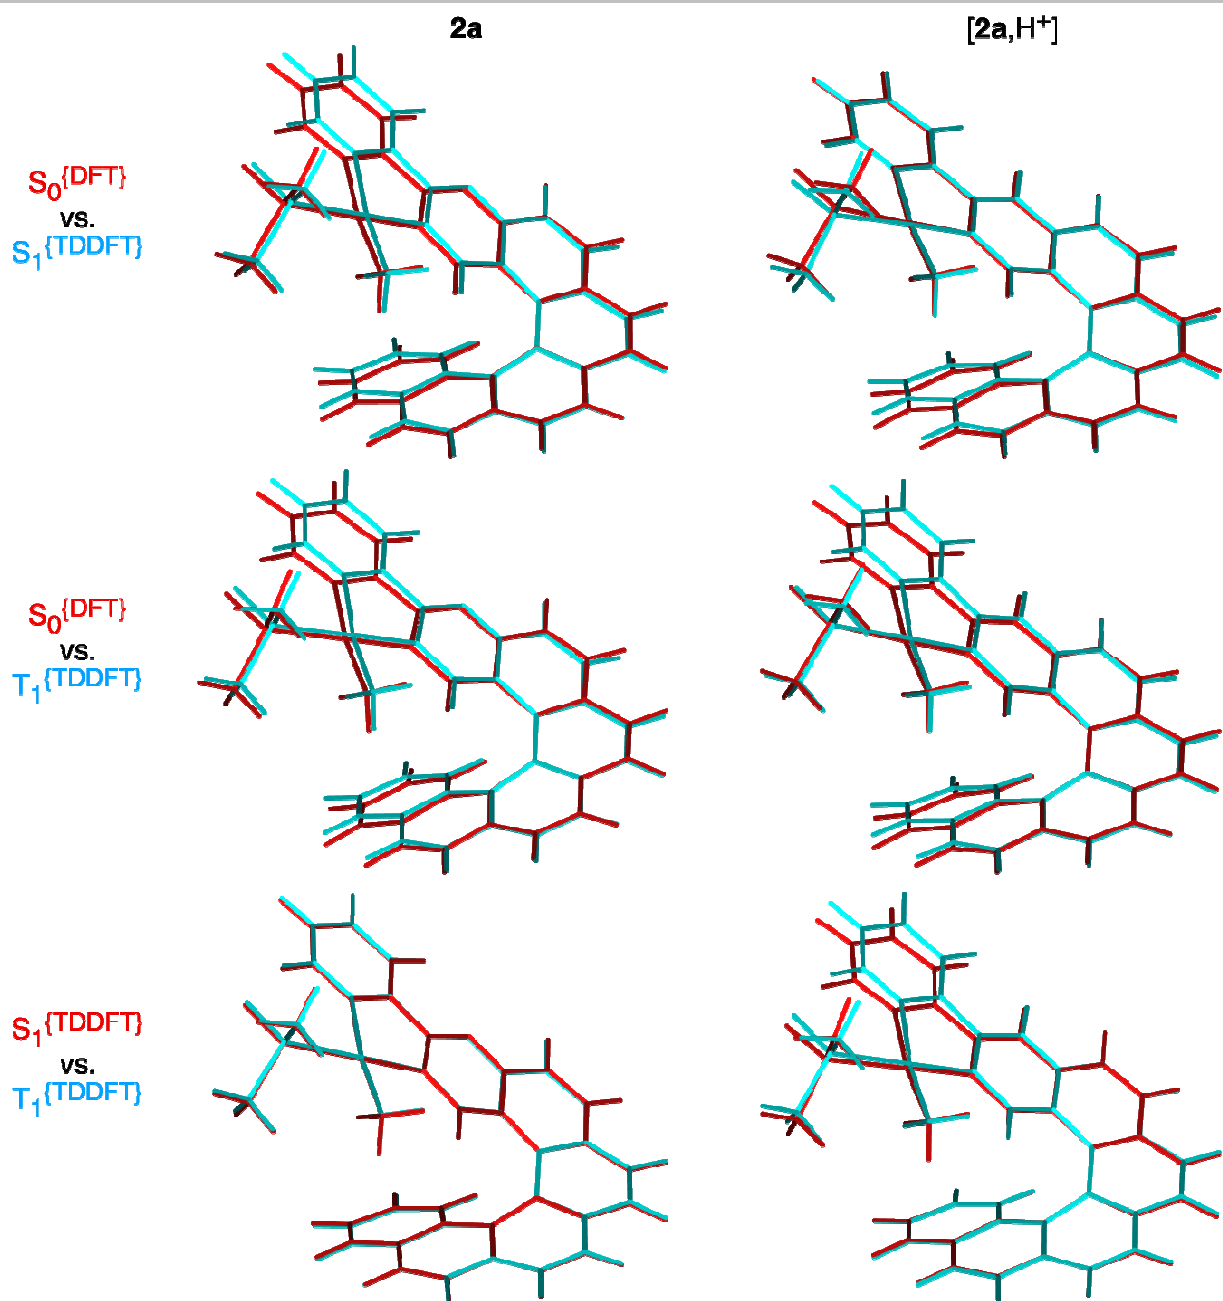

**Figure S32.** Overlays of optimized ground-state,  $S_0^{\text{DFT}}$  (BP/SV(P) acetone), and excited-states,  $S_1^{\text{TDDFT}}$  and  $T_1^{\text{TDDFT}}$  (BHLYP/SV(P) acetone), structures of the metal-complex species.



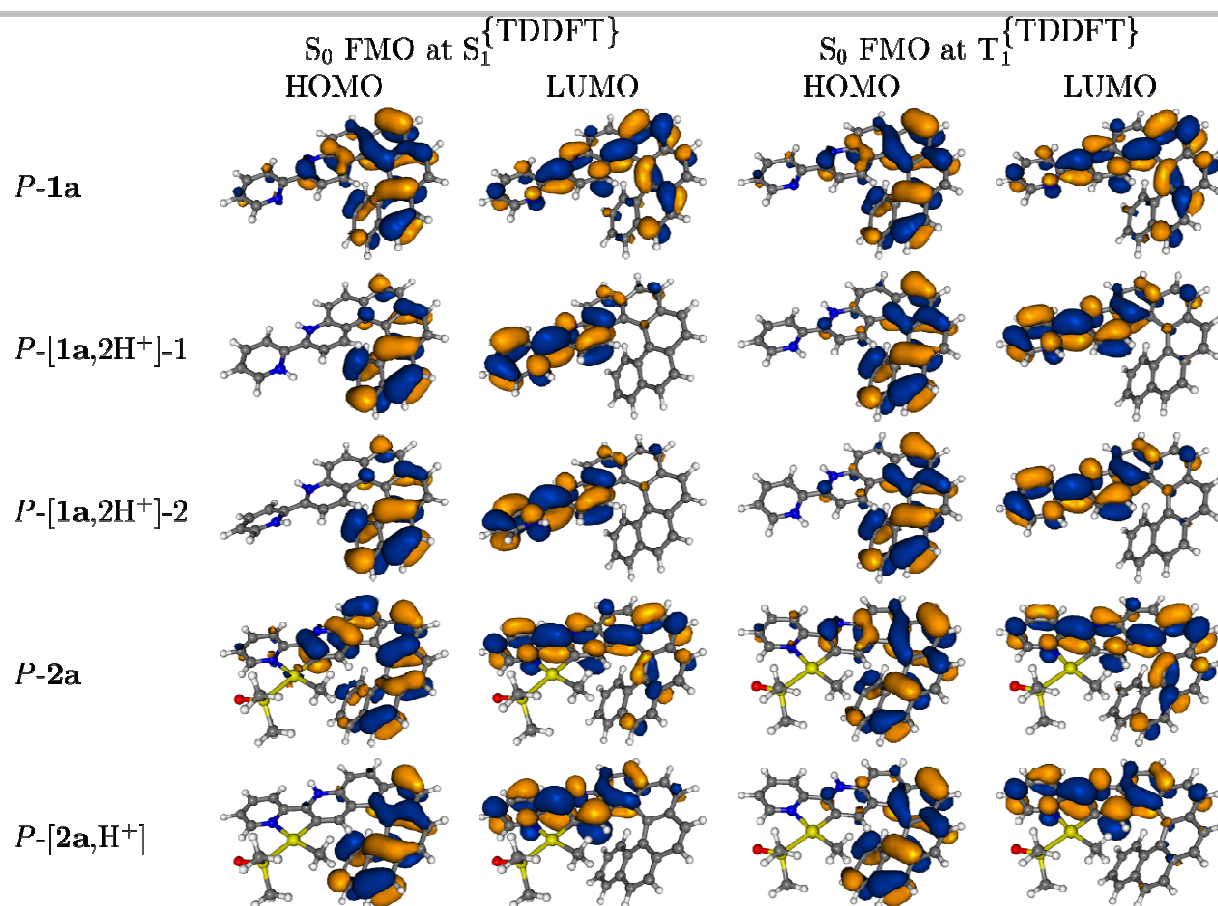

**Figure S33.** Isosurfaces (0.03 au) of frontier molecular orbitals (FMOs) of  $S_0$  at the  $S_1^{\{TDDFT\}}$  and  $T_1^{\{TDDFT\}}$  excited-state geometry calculated with BHLYP/SV(P) DCM. The corresponding acetone data appeared to be very similar and therefore they are not shown.

**Table S9.** HOMO-to-LUMO character (in %) of  $S_0$ - $S_1$  absorption along with  $S_1$ - $S_0$  and  $T_1$ - $S_0$  emission transitions for ligand species **1a** and **[1a,2H<sup>+</sup>]** and of cycloplatinated complexes **2a** and **[2a,H<sup>+</sup>]**. BHLYP/SV(P) solvent data.

|                                | $S_0$ - $S_1$ | $S_1$ - $S_0$ | $T_1$ - $S_0$ |
|--------------------------------|---------------|---------------|---------------|
| <i>P-1a</i>                    | 33.0          | 93.7          | 72.3          |
| <i>P-[1a,2H<sup>+</sup>]-1</i> | 91.7          | 96.5          | 76.0          |
| <i>P-[1a,2H<sup>+</sup>]-2</i> | ---           | 96.4          | 75.9          |
| <i>P-2a</i>                    | 53.8          | 92.3          | 68.9          |
| <i>P-[2a,H<sup>+</sup>]</i>    | 75.5          | 90.1          | 61.6          |

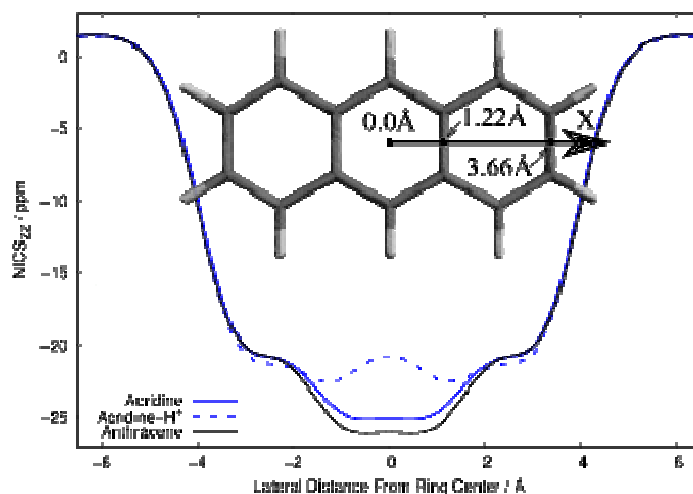

**Figure S34.** A model to rationalize the breaking of  $\pi$ -conjugation upon protonation for complex **2a**. The nuclear-independent chemical shift (NICS) is used to investigate the extent of aromaticity in a poly-aromatic conjugated system. NICS<sub>ZZ-X</sub> scans are plotted, along with the anthracene molecular structure highlighting the lateral distance measurement. The *acridine* structure replaces the CH group in position 10 (top center) with a nitrogen to give a planar fragment similar to what is found in the ligand of **2a**. Acridine can be subsequently protonated to form acridine-H<sup>+</sup>. NICS<sub>ZZ-X</sub> scans were calculated at 1.7 Å above the molecular plane, as suggested in Reference 46. The flat NICS<sub>ZZ</sub> values in the ring centers of anthracene and acridine suggest global ring currents. However, upon protonation the center ring's curve is no longer flat suggesting a significant loss of aromaticity.

---

## Atomic coordinates

The optimized BP/SV(P) COSMO DCM geometries of ligand species **1a** and [**1a**,2H<sup>+</sup>]-1 and of cycloplatinated complexes **2a** and [**2a**,H<sup>+</sup>] (the atomic symbol followed by three Cartesian coordinates, in Å) with the corresponding total energy values in solution  $E$  (in au, listed as ‘Total energy + OC corr.’ in output files).

### *P-1a*

$E = -1262.727515$

|   |            |            |            |
|---|------------|------------|------------|
| C | 3.6062020  | -3.8139641 | -0.5411308 |
| C | 2.6162200  | -3.0834399 | -1.2375152 |
| N | 2.1319701  | -3.4848062 | -2.4360812 |
| C | 2.6162106  | -4.6165376 | -2.9713420 |
| C | 3.6003285  | -5.4111363 | -2.3546315 |
| C | 4.1028631  | -4.9942527 | -1.1098396 |
| C | 2.0619066  | -1.8196377 | -0.6660464 |
| N | 2.5291534  | -1.4186085 | 0.5202497  |
| C | 2.0416784  | -0.2794830 | 1.0817833  |
| C | 0.9766891  | 0.4959315  | 0.4914267  |
| C | 0.5556935  | 0.0745100  | -0.8026101 |
| C | 1.0930523  | -1.0639466 | -1.3859186 |
| C | 2.6700547  | 0.1815495  | 2.2896392  |
| C | 2.3334157  | 1.4069645  | 2.8137278  |
| C | 1.2846305  | 2.2082052  | 2.2403755  |
| C | 0.4830722  | 1.6908997  | 1.1674634  |
| C | 1.0887952  | 3.5489997  | 2.7029949  |
| C | 0.1993971  | 4.3797934  | 2.0558471  |
| C | -0.6886844 | 3.8634144  | 1.0577382  |
| C | -0.6858873 | 2.4561308  | 0.7452290  |
| C | -1.8447654 | 1.9307657  | 0.0312574  |
| C | -2.6367327 | 2.8510804  | -0.7344438 |
| C | -2.4536777 | 4.2632562  | -0.5783286 |
| C | -1.5794168 | 4.7488697  | 0.3695612  |
| C | -3.6599225 | 2.3637593  | -1.6196850 |
| C | -3.9742000 | 1.0261127  | -1.6773533 |
| C | -3.3659876 | 0.0996039  | -0.7637053 |
| C | -2.3300433 | 0.5537473  | 0.1328544  |
| C | -3.8282065 | -1.2467773 | -0.6886526 |
| C | -3.3457866 | -2.1201545 | 0.2809285  |
| C | -2.3958213 | -1.6541565 | 1.2239580  |
| C | -1.8999601 | -0.3544406 | 1.1445617  |
| H | 0.7913607  | -1.3949470 | -2.3900320 |
| H | -2.0499098 | -2.3194186 | 2.0323026  |
| H | -3.7206224 | -3.1555103 | 0.3357083  |
| H | -1.5238735 | 5.8280938  | 0.5880768  |
| H | -4.6038292 | -1.5759488 | -1.4003980 |
| H | -3.0826225 | 4.9487672  | -1.1700001 |
| H | -4.7468078 | 0.6588356  | -2.3731619 |
| H | -4.1959108 | 3.0940367  | -2.2485832 |
| H | -1.1831096 | -0.0144516 | 1.9048155  |
| H | 0.1335477  | 5.4489651  | 2.3174920  |
| H | 1.7191852  | 3.9259504  | 3.5250830  |
| H | 3.4644160  | -0.4433171 | 2.7269830  |
| H | 2.8755931  | 1.8092970  | 3.6858952  |
| H | -0.1767839 | 0.6720198  | -1.3633235 |
| H | 2.1972202  | -4.9116389 | -3.9518359 |
| H | 3.9608048  | -6.3313595 | -2.8416701 |
| H | 4.8754661  | -5.5834052 | -0.5884537 |

---

H 3.9636350 -3.4382209 0.4287899

**P-2a**

$E = -1974.573378$

Pt -0.5747156 -0.5548722 3.8887759  
O 0.6630562 0.0494855 7.0237674  
C 3.3361181 -0.4585048 1.9395308  
N 1.1969166 -1.0179740 0.0804242  
C -2.6316681 -0.8415939 3.8527364  
S -0.6266992 -0.2677056 6.2739295  
C 4.3037361 -0.1875697 2.9159226  
H 5.3708564 -0.1296850 2.6452013  
C 3.8869481 0.0090906 4.2444513  
H 4.6083352 0.2262572 5.0476887  
C 2.5200748 -0.0755643 4.5491949  
H 2.1341167 0.0599461 5.5756616  
N 1.5874011 -0.3350008 3.6056299  
C 1.9809131 -0.5228072 2.3109912  
C 0.8839825 -0.7770359 1.3544650  
C -0.4568593 -0.7624084 1.8781977  
C -1.4759097 -0.8778808 0.9290574  
C -1.1964161 -1.0555844 -0.4568715  
C -2.2249041 -1.2059038 -1.4830147  
C -3.6351369 -0.8861218 -1.2913041  
C -4.1684065 0.1174650 -0.3760663  
C -3.4537649 1.3252338 0.0401861  
C -2.2767910 1.8003466 -0.6094821  
H -1.8802962 1.2521805 -1.4754274  
C -1.6354370 2.9691515 -0.2050508  
H -0.7369569 3.3104889 -0.7455538  
C -2.1348761 3.7230437 0.8862942  
H -1.6129661 4.6372596 1.2147564  
C -3.3099204 3.3191948 1.5120223  
H -3.7417194 3.9204461 2.3303053  
C -4.0058112 2.1494446 1.0885928  
C -5.2898497 1.8280535 1.6460856  
H -5.6867280 2.4527109 2.4640280  
C -6.0472070 0.8165388 1.1032847  
H -7.0745921 0.6317919 1.4595024  
C -5.5312772 -0.0194507 0.0533073  
C -6.4040452 -0.9479758 -0.6017271  
H -7.4500276 -1.0240175 -0.2608056  
C -5.9675169 -1.6529287 -1.7027390  
H -6.6651970 -2.2722865 -2.2908116  
C -4.5860430 -1.6293574 -2.0799554  
C -4.1504957 -2.3430138 -3.2430882  
H -4.9067298 -2.8563082 -3.8602399  
C -2.8203394 -2.3502733 -3.6062947  
H -2.4928704 -2.8310751 -4.5430869  
C -1.8289415 -1.8245093 -2.7166607  
C -0.4341093 -1.9727181 -3.0393773  
H -0.1703082 -2.3845795 -4.0278801  
C 0.5490333 -1.6208268 -2.1441761  
H 1.6200582 -1.7117247 -2.3853302  
C 0.1929448 -1.2060544 -0.8156394  
H -3.1098478 0.0006741 3.2999801  
H -3.1174913 -0.9026943 4.8538924  
H -2.8720252 -1.7883994 3.3155354  
C -1.3582162 -1.7162770 7.1127623  
H -1.4187320 -1.4759761 8.1948762

---

|   |            |            |           |
|---|------------|------------|-----------|
| H | -0.6535306 | -2.5537251 | 6.9339551 |
| H | -2.3550331 | -1.9449659 | 6.6832959 |
| C | -1.8218598 | 1.0278335  | 6.7526737 |
| H | -2.8186449 | 0.8086271  | 6.3185679 |
| H | -1.4159627 | 1.9752194  | 6.3434835 |
| H | -1.8500979 | 1.0580476  | 7.8619748 |
| H | -2.5262806 | -0.8658343 | 1.2517065 |
| H | 3.5930132  | -0.6229504 | 0.8822333 |

*P*-[1a,2H<sup>+</sup>]-1

*E* = -1263.564325

|   |            |            |            |
|---|------------|------------|------------|
| N | -3.7038993 | -1.1142510 | -2.8581389 |
| C | -3.6351172 | -1.1247343 | -1.4918229 |
| C | -2.3007204 | -1.1054351 | -0.8687475 |
| C | -1.1703038 | -0.4974064 | -1.4406383 |
| C | -4.8649540 | -1.1043124 | -3.5527410 |
| C | -6.0812071 | -1.1114943 | -2.8694439 |
| C | -6.0648336 | -1.1280135 | -1.4645348 |
| C | -4.8414298 | -1.1311373 | -0.7741758 |
| H | -2.8271702 | -1.1458095 | -3.3984159 |
| H | -4.7752843 | -1.1013109 | -4.6484321 |
| H | -7.0227752 | -1.1053906 | -3.4374178 |
| H | -7.0085919 | -1.1256344 | -0.8974165 |
| H | -4.8312074 | -1.1012996 | 0.3252550  |
| C | 0.0382938  | -0.4797481 | -0.7391493 |
| C | 0.1717699  | -1.0594101 | 0.5477855  |
| C | -0.9835717 | -1.7601068 | 1.0549491  |
| N | -2.1525560 | -1.7132896 | 0.3380720  |
| C | -0.9264896 | -2.5448978 | 2.2376686  |
| C | 0.3035190  | -2.7209755 | 2.8352520  |
| C | 1.4891938  | -2.0624741 | 2.3626223  |
| C | 1.4064452  | -1.0814621 | 1.3138603  |
| C | 2.5868963  | -0.2929182 | 0.9922929  |
| C | 2.7564043  | -2.4264062 | 2.9071772  |
| C | 3.9099155  | -1.9101256 | 2.3491830  |
| C | 3.8561897  | -0.8633369 | 1.3770351  |
| C | 5.0675354  | -0.3758962 | 0.7901750  |
| C | 5.0281843  | 0.6452303  | -0.1333393 |
| C | 3.8145457  | 1.3728582  | -0.3626791 |
| C | 2.6033392  | 0.9921750  | 0.3078877  |
| C | 1.5146903  | 1.9699710  | 0.3408381  |
| C | 1.5713748  | 3.1168921  | -0.5339751 |
| C | 2.7310883  | 3.3327707  | -1.3531191 |
| C | 3.8346453  | 2.5213059  | -1.2255722 |
| C | 0.5102505  | 4.0684266  | -0.5259145 |
| C | -0.5583127 | 3.9462714  | 0.3568193  |
| C | -0.5774704 | 2.8712460  | 1.2798185  |
| C | 0.4305127  | 1.9080496  | 1.2651054  |
| H | -1.2348228 | -0.0015105 | -2.4196662 |
| H | 0.9120114  | -0.0205044 | -1.2198236 |
| H | -2.9459948 | -2.2439394 | 0.7248799  |
| H | -1.8302310 | -3.0464872 | 2.6164009  |
| H | 0.3953275  | -3.3947355 | 3.7024448  |
| H | 2.8009645  | -3.1763389 | 3.7124124  |
| H | 4.8981476  | -2.2770407 | 2.6703783  |
| H | 6.0206819  | -0.8544627 | 1.0664513  |
| H | 5.9454293  | 0.9720039  | -0.6494809 |
| H | 4.7617263  | 2.7435406  | -1.7786847 |
| H | 2.7481596  | 4.2010478  | -2.0321031 |
| H | 0.5705313  | 4.9280253  | -1.2139884 |

---

|   |            |           |           |
|---|------------|-----------|-----------|
| H | -1.3637147 | 4.6984157 | 0.3640250 |
| H | -1.3835409 | 2.8030882 | 2.0286528 |
| H | 0.4064254  | 1.1109776 | 2.0219786 |

*P*-[2a,H<sup>+</sup>]

*E* = -1975.010644

|    |            |            |            |
|----|------------|------------|------------|
| Pt | -0.5788852 | -0.5320633 | 3.8776582  |
| O  | 0.6439256  | 0.0479643  | 6.9855311  |
| C  | 3.3679938  | -0.4518095 | 1.9670468  |
| N  | 1.1474715  | -1.0222698 | 0.0769503  |
| C  | -2.6352601 | -0.7948768 | 3.8176704  |
| S  | -0.6547758 | -0.2621200 | 6.2543605  |
| C  | 4.3222705  | -0.1875401 | 2.9609380  |
| H  | 5.3907607  | -0.1262468 | 2.7006271  |
| C  | 3.8864983  | -0.0014171 | 4.2806933  |
| H  | 4.5967392  | 0.2107132  | 5.0945252  |
| C  | 2.5131595  | -0.0856701 | 4.5660416  |
| H  | 2.1141196  | 0.0472604  | 5.5883121  |
| N  | 1.5941719  | -0.3378582 | 3.6119924  |
| C  | 2.0080864  | -0.5217285 | 2.3194466  |
| C  | 0.9020257  | -0.7662867 | 1.3851029  |
| C  | -0.4370237 | -0.7427687 | 1.8694247  |
| C  | -1.4496741 | -0.8662034 | 0.9038041  |
| C  | -1.1938803 | -1.0465671 | -0.4839417 |
| C  | -2.2315790 | -1.2011761 | -1.4984321 |
| C  | -3.6363630 | -0.8829838 | -1.2890618 |
| C  | -4.1604292 | 0.1161889  | -0.3657874 |
| C  | -3.4447119 | 1.3239945  | 0.0462573  |
| C  | -2.2767677 | 1.8073918  | -0.6140442 |
| H  | -1.8912851 | 1.2717295  | -1.4932123 |
| C  | -1.6360439 | 2.9768289  | -0.2097478 |
| H  | -0.7483483 | 3.3287722  | -0.7609325 |
| C  | -2.1281614 | 3.7231435  | 0.8900443  |
| H  | -1.6095281 | 4.6400447  | 1.2151759  |
| C  | -3.2954663 | 3.3118998  | 1.5252494  |
| H  | -3.7234988 | 3.9093964  | 2.3477643  |
| C  | -3.9897595 | 2.1404956  | 1.1044637  |
| C  | -5.2662775 | 1.8107777  | 1.6741384  |
| H  | -5.6573846 | 2.4306111  | 2.4981071  |
| C  | -6.0254878 | 0.7971536  | 1.1377813  |
| H  | -7.0476032 | 0.6064637  | 1.5046971  |
| C  | -5.5162035 | -0.0323635 | 0.0803497  |
| C  | -6.3905519 | -0.9660484 | -0.5658439 |
| H  | -7.4316019 | -1.0482168 | -0.2122720 |
| C  | -5.9660598 | -1.6689512 | -1.6722876 |
| H  | -6.6679406 | -2.2909501 | -2.2514905 |
| C  | -4.5894749 | -1.6378446 | -2.0646639 |
| C  | -4.1636781 | -2.3529896 | -3.2293450 |
| H  | -4.9251950 | -2.8694149 | -3.8365151 |
| C  | -2.8382123 | -2.3610509 | -3.6098799 |
| H  | -2.5206338 | -2.8416200 | -4.5492300 |
| C  | -1.8434988 | -1.8312236 | -2.7291790 |
| C  | -0.4532783 | -1.9783200 | -3.0624264 |
| H  | -0.1952645 | -2.3906823 | -4.0514498 |
| C  | 0.5480977  | -1.6271318 | -2.1838701 |
| H  | 1.6120120  | -1.7279229 | -2.4507621 |
| C  | 0.1762364  | -1.2127464 | -0.8733551 |
| H  | -3.0966026 | 0.0488009  | 3.2534083  |
| H  | -3.1328006 | -0.8434211 | 4.8120384  |
| H  | -2.8728930 | -1.7451712 | 3.2858189  |

---

|   |            |            |            |
|---|------------|------------|------------|
| C | -1.3776500 | -1.7232350 | 7.0697654  |
| H | -1.4248485 | -1.5016340 | 8.1563898  |
| H | -0.6780226 | -2.5594635 | 6.8675284  |
| H | -2.3806266 | -1.9395809 | 6.6486282  |
| C | -1.8430280 | 1.0321176  | 6.7391737  |
| H | -2.8454531 | 0.8089621  | 6.3209148  |
| H | -1.4446045 | 1.9795748  | 6.3231604  |
| H | -1.8563032 | 1.0630748  | 7.8485842  |
| H | -2.4980009 | -0.8592333 | 1.2325732  |
| H | 3.6961978  | -0.5931681 | 0.9251182  |
| H | 2.1216736  | -1.1201428 | -0.2393003 |

---

## References

- (1) Turbomole V6.5., Quantum Chemistry Group, University of Karlsruhe, Germany, 2013.
- (2) Becke, A. D. *Phys. Rev. A* **1988**, *38*, 3098–3100.
- (3) Perdew, J. P. *Phys. Rev. B* **1986**, *33*, 8822–8824.
- (4) Perdew, J. P. *Phys. Rev. B* **1986**, *34*, 7406.
- (5) Weigend, F.; Ahlrichs, R. *Phys. Chem. Chem. Phys.* **2005**, *7*, 3297–3305.
- (6) Andrae, D.; Häußermann, U.; Dolg, M.; Stoll, H.; Preuß, H. *Theor. Chim. Acta* **1990**, *77*, 123–141.
- (7) Feller, D. *J. Comput. Chem.* **1996**, *17*, 1571–1586.
- (8) Schuchardt, K. L.; Didier, B. T.; Elsethagen, T.; Sun, L.; Gurumoorhi, V.; Chase, J.; Li, J.; Windus, T. L. *J. Chem. Info. Mod.* *47*, 1045–1052.
- (9) Becke, A. D. *J. Chem. Phys.* **1993**, *98*, 1372–1377.
- (10) Lee, C.; Yang, W.; Parr, R. G. *Phys. Rev. B* **1988**, *37*, 785–789.
- (11) Gaussian 09, Revision D.01, Frisch, M. J.; Trucks, G. W.; Schlegel, H. B.; Scuseria, G. E.; Robb, M. A.; Cheeseman, J. R.; Scalmani, G.; Barone, V.; Mennucci, B.; Petersson, G. A.; Nakatsuji, H.; Caricato, M.; Li, X.; Hratchian, H. P.; Izmaylov, A. F.; Bl, D. J. *Gaussian 09, Revision D.01*; Gaussian, Inc.: Wallingford CT, 2009.
- (12) Tamm, I. *J. Phys. USSR* **1945**, *9*, 449.
- (13) Dancoff, S. M. *Phys. Rev.* **1950**, *78*, 382.
- (14) Hirata, S.; Head-Gordon, M. *Chem. Phys. Lett.* **1999**, *314*, 291–299.
- (15) Peach, M. J. G.; Williamson, M. J.; Tozer, D. J. *J. Chem. Theory Comput.* **2011**, *7*, 3578–3585.
- (16) Peach, M. J. G.; Tozer, D. J. *J. Phys. Chem. A* **2012**, *116*, 9783–9789.
- (17) Peach, M. J. G.; Warner, N.; Tozer, D. J. *Mol. Phys.* **2013**, *111*, 1271–1274.
- (18) Vydrov, O. A.; Scuseria, G. E. *J. Chem. Phys.* **2006**, *125*, 234109.
- (19) Vydrov, O. A.; Heyd, J.; Krukau, A. V.; Scuseria, G. E. *J. Chem. Phys.* **2006**, *125*, 074106.
- (20) Vydrov, O. A.; Scuseria, G. E.; Perdew, J. P. *J. Chem. Phys.* **2007**, *126*, 154109.
- (21) Yanai, T.; Tew, D. P.; Handy, N. C. *Chem. Phys. Lett.* **2004**, *393*, 51–57.
- (22) Perdew, J. P.; Burke, K.; Ernzerhof, M. *Phys. Rev. Lett.* **1996**, *77*, 3865–3868.
- (23) Valiev, M.; Bylaska, E. J.; Govind, N.; Kowalski, K.; Straatsma, T. P.; Van Dam, H. J. J.; Wang, D.; Nieplocha, J.; Apra, E.; Windus, T. L.; de Jong, W. A. *Comput. Phys. Commun.* **2010**, *181*, 1477–1489.
- (24) Baer, R.; Livshits, E.; Salzner, U. *Annu. Rev. Phys. Chem.* **2010**, *61*, 85–109.
- (25) Kronik, L.; Stein, T.; Refaely-Abramson, S.; Baer, R. *J. Chem. Theory Comput.* **2012**, *8*, 1515–1531.



- 
- (26) Refaely-Abramson, S.; Sharifzadeh, S.; Govind, N.; Autschbach, J.; Neaton, J. B.; Baer, R.; Kronik, L. *Phys. Rev. Lett.* **2012**, *109*, 226405.
- (27) Sun, H.; Autschbach, J. *ChemPhysChem* **2013**, *14*, 2450–2461.
- (28) Jacquemin, D.; Moore, B.; Planchat, A.; Adamo, C.; Autschbach, J. *J. Chem. Theory Comput.* **2014**, *10*, 1677–1685.
- (29) Refaely-Abramson, S.; Baer, R.; Kronik, L. *Phys. Rev. B* **2011**, *84*, 075144.
- (30) Srebro, M.; Autschbach, J. *J. Chem. Theory Comput.* **2012**, *8*, 245–256.
- (31) Stein, T.; Eisenberg, H.; Kronik, L.; Baer, R. *Phys. Rev. Lett.* **2010**, *105*, 266802.
- (32) Moore, B.; Autschbach, J. *ChemistryOpen* **2012**, *1*, 184–194.
- (33) Gledhill, J. D.; Peach, M. J. G.; Tozer, D. J. *J. Chem. Theory Comput.* **2013**, *9*, 4414–4420.
- (34) Srebro, M.; Autschbach, J. *J. Phys. Chem. Lett.* **2012**, *3*, 576–581.
- (35) Cohen, A. J.; Mori-Sánchez, P.; Yang, W. *Science* **2008**, *321*, 792–794.
- (36) Moore, B.; Srebro, M.; Autschbach, J. *J. Chem. Theory Comput.* **2012**, *8*, 4336–4346.
- (37) II, B. M.; Autschbach, J. *J. Chem. Theory Comput.* **2013**, *9*, 4991–5003.
- (38) Sun, H.; Autschbach, J. *J. Chem. Theory Comput.* **2014**, *10*, 1035–1047.
- (39) Nakai, Y.; Mori, T.; Sato, K.; Inoue, Y. *J. Phys. Chem. A* **2013**, *117*, 5082–5092.
- (40) Klamt, A.; Schüürmann, G. *J. Chem. Soc., Perkin Trans. 2* **1993**, 799.
- (41) Klamt, A. *J. Phys. Chem.* **1996**, *100*, 3349–3353.
- (42) Scalmani, G.; Frisch, M. J.; Mennucci, B.; Tomasi, J.; Cammi, R.; Barone, V. *J. Chem. Phys.* **2006**, *124*, 94107.
- (43) Tomasi, J.; Mennucci, B.; Cammi, R. *Chem. Rev.* **2005**, *105*, 2999–3093.
- (44) Cammi, R.; Mennucci, B.; Tomasi, J. *J. Phys. Chem. A* **2000**, *104*, 5631–5637.
- (45) Cossi, M.; Barone, V. *J. Chem. Phys.* **2001**, *115*, 4708–4717.
- (46) Gershoni-Poranne, R.; Stanger, A. *Chem. Eur. J.* **2014**, *20*, 5673–5688.

$^1\text{H}$  NMR ( $\text{CD}_2\text{Cl}_2$ , 400 MHz)

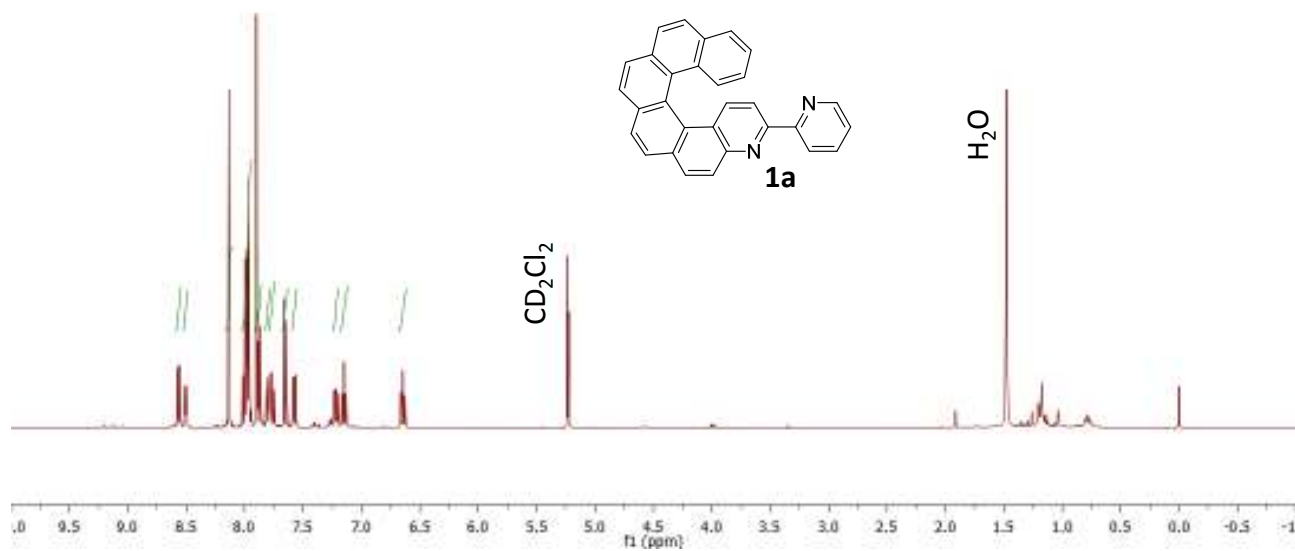

$^{13}\text{C}$  NMR ( $\text{CD}_2\text{Cl}_2$ , 101 MHz)

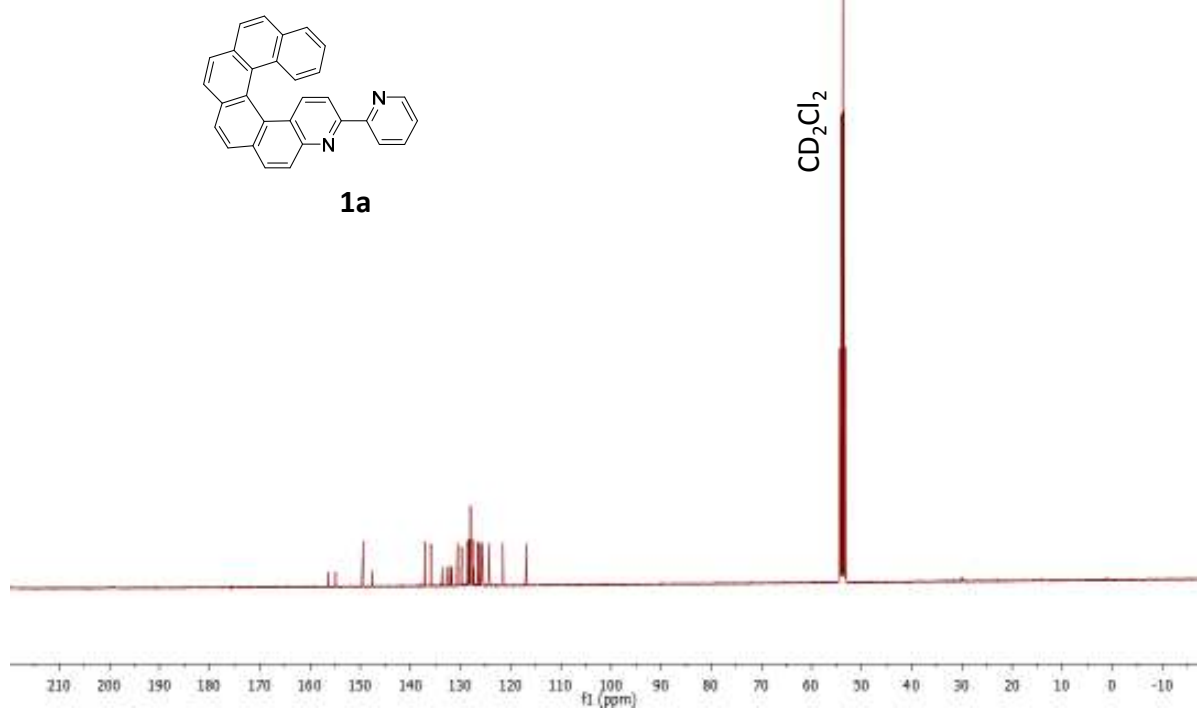

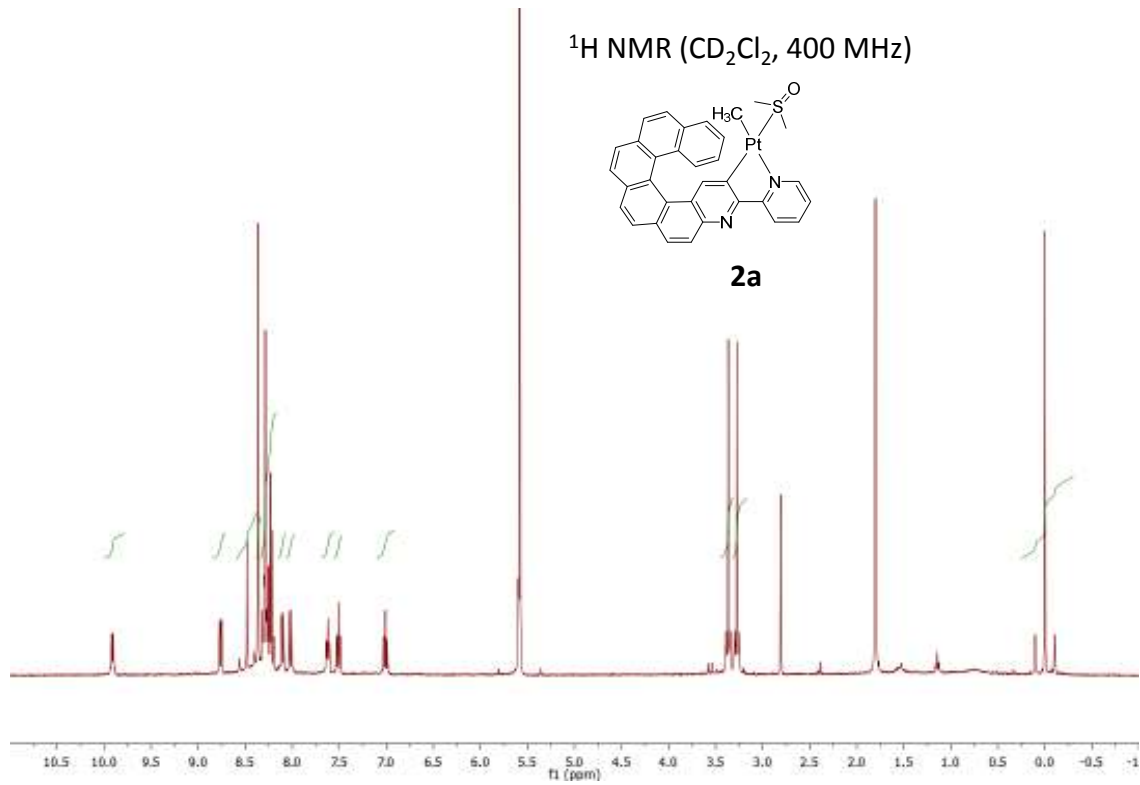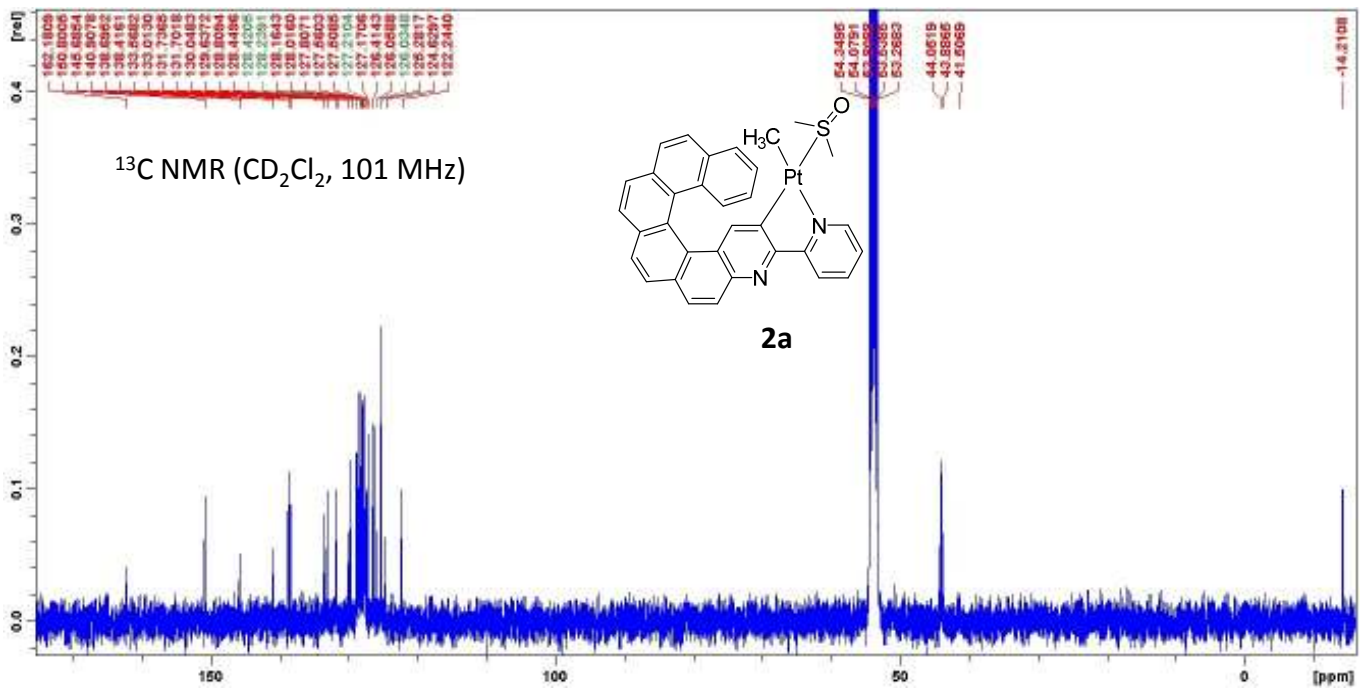

$^1\text{H}$  NMR ( $\text{CDCl}_3$ , 400 MHz)

$\text{CDCl}_3$

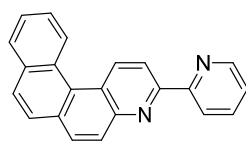

**1b**

acetone

$\text{H}_2\text{O}$

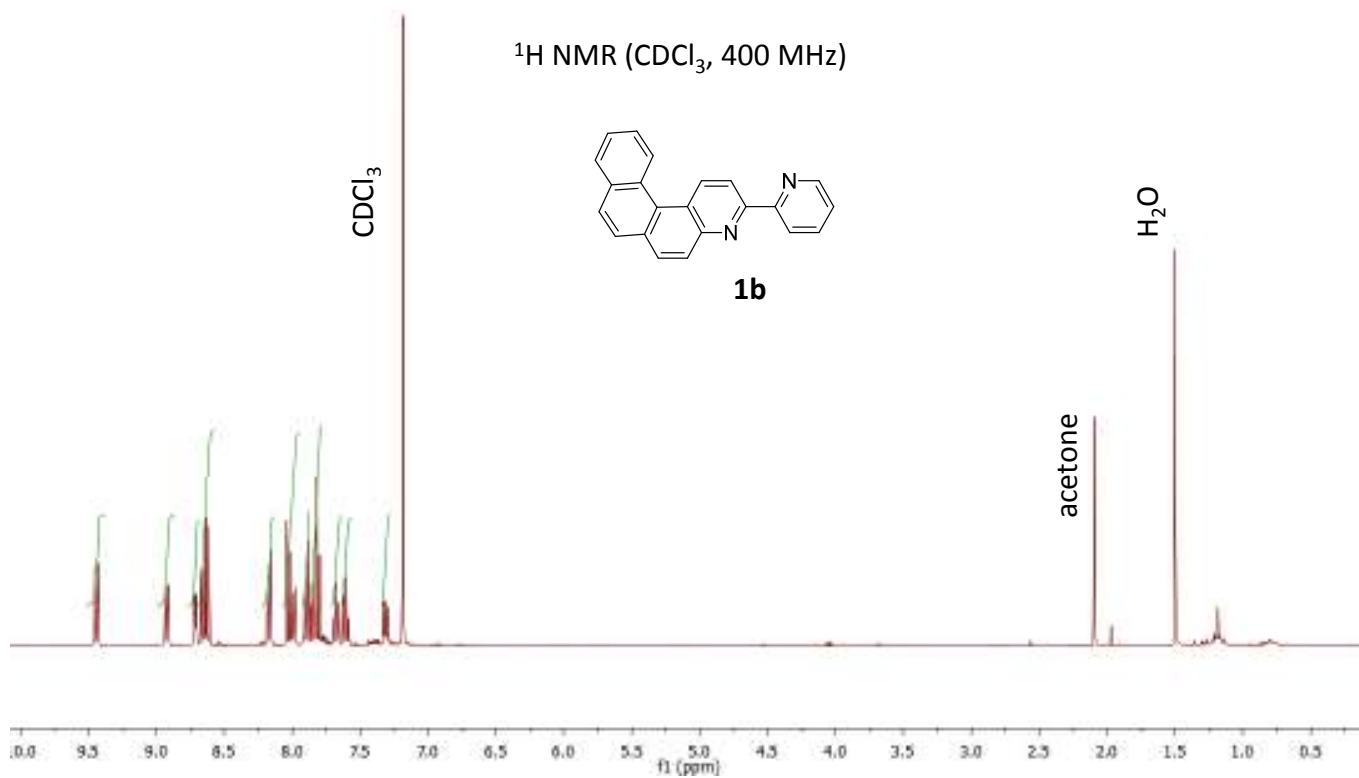

$^{13}\text{C}$  NMR ( $\text{CD}_2\text{Cl}_2$ , 75 MHz)

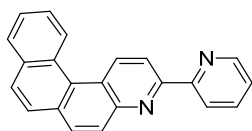

**1b**

$\text{CD}_2\text{Cl}_2$

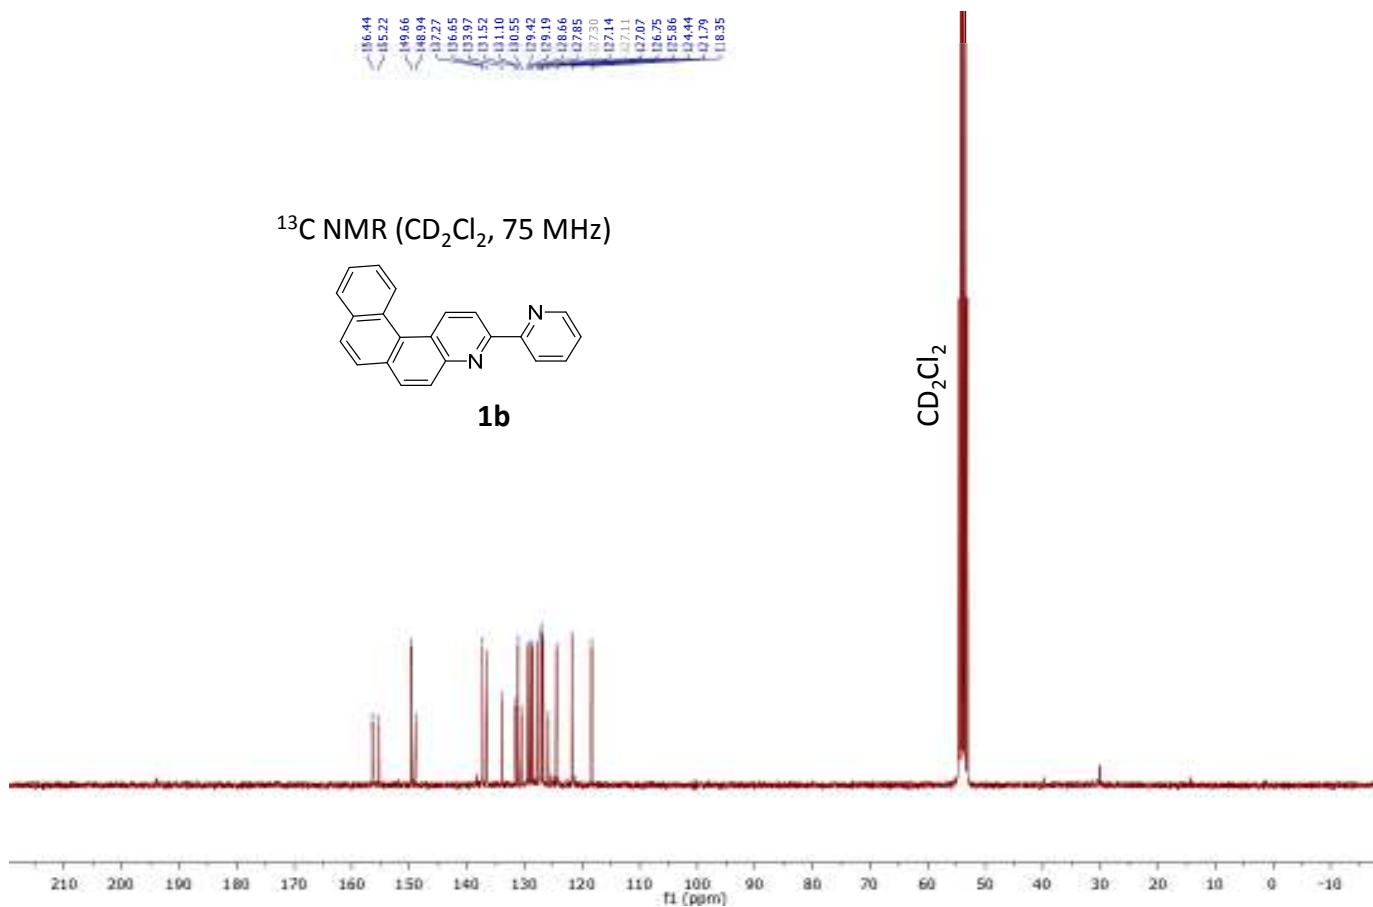

$^1\text{H}$  NMR ( $\text{CD}_2\text{Cl}_2$ , 400 MHz)

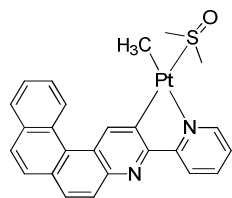

**2b**

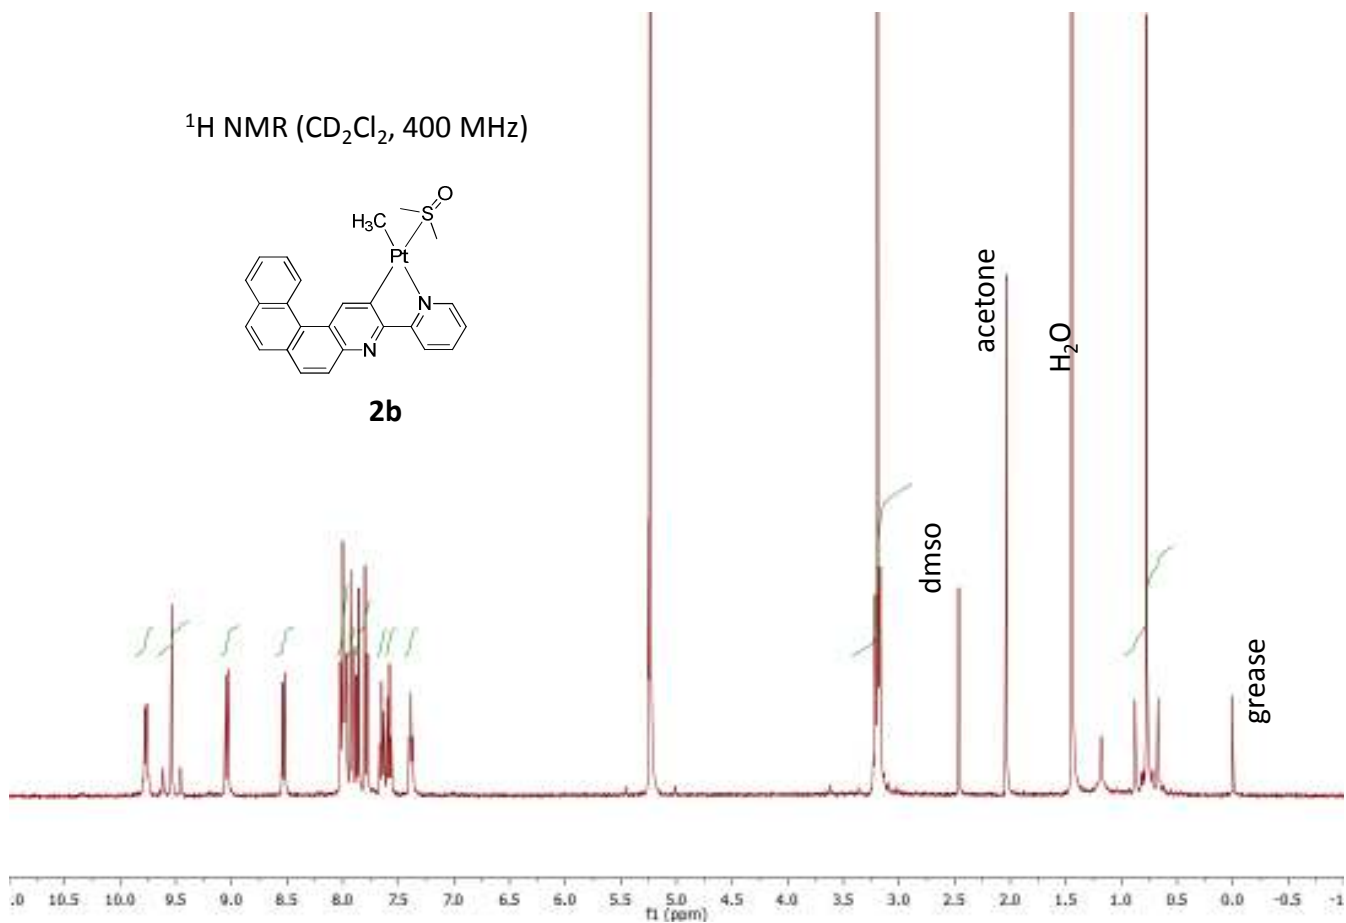

$^{13}\text{C}$  NMR ( $\text{CD}_2\text{Cl}_2$ , 101 MHz)

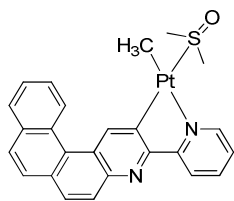

**2b**

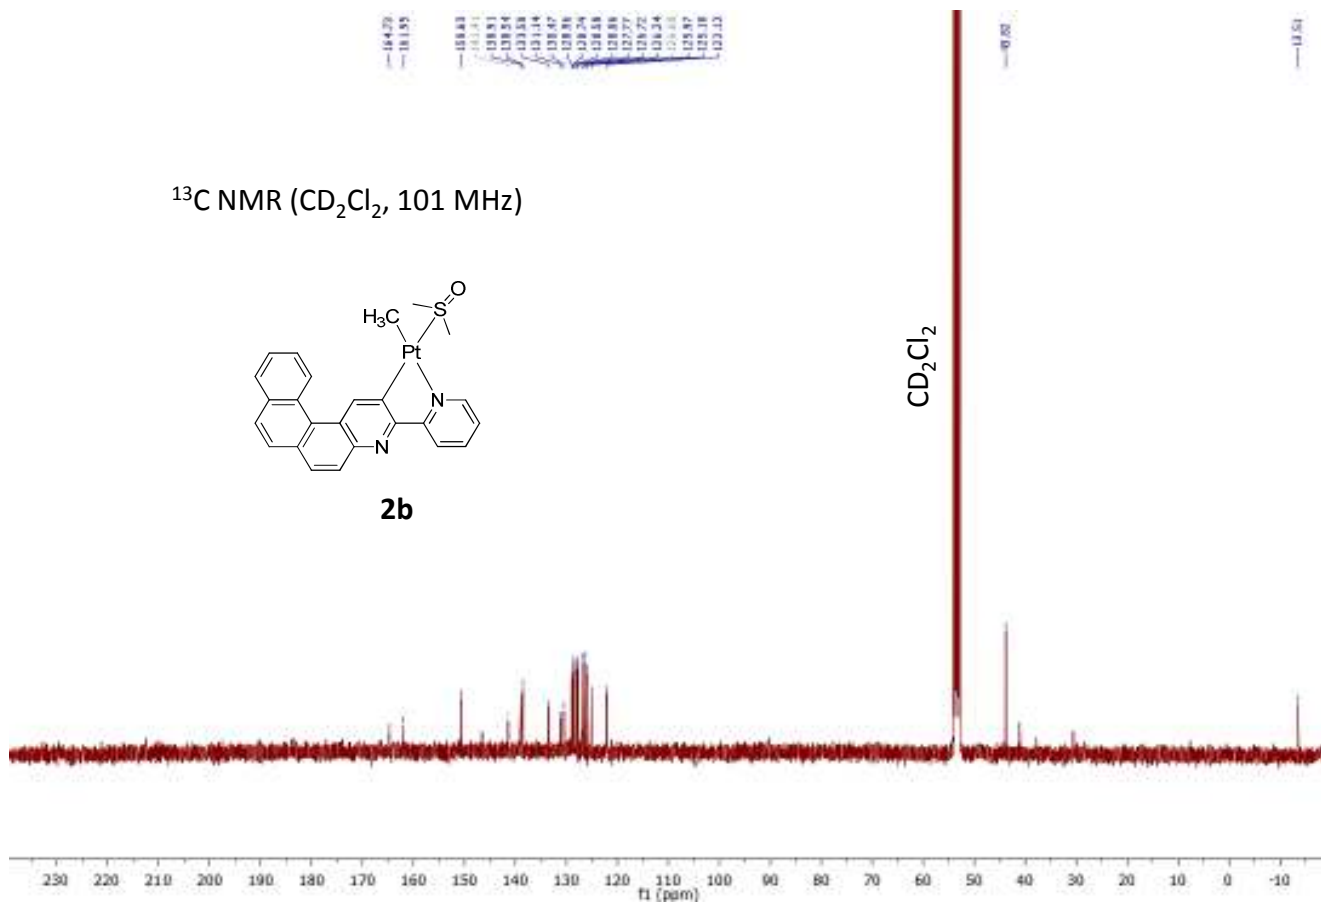

$^1\text{H}$  NMR ( $\text{CD}_2\text{Cl}_2$ , 400 MHz)

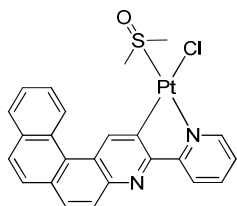

**Pt(1b-H)dmsocl**

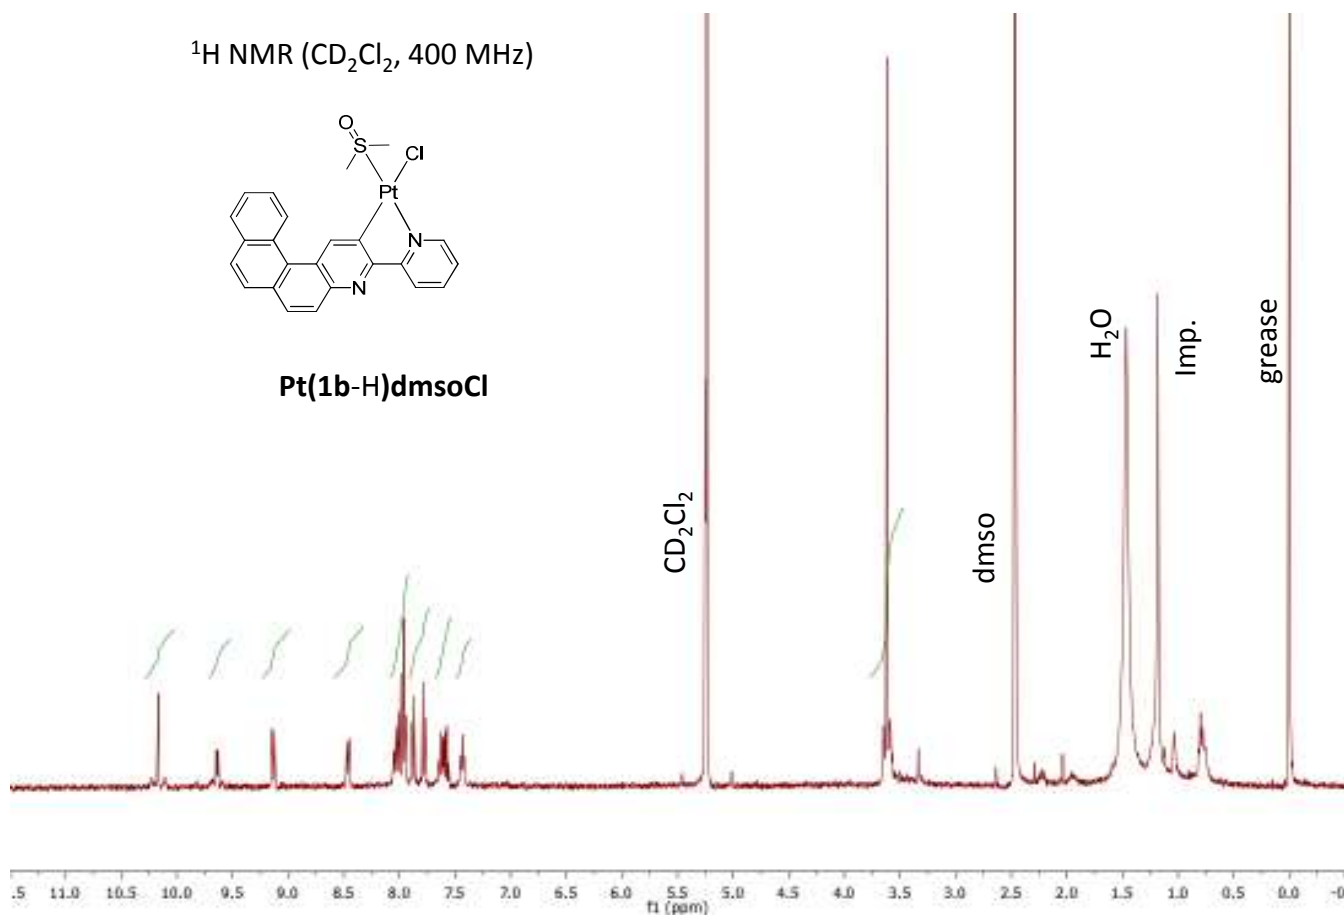

$^1\text{H}$  NMR ( $\text{CD}_2\text{Cl}_2$ , 400 MHz)

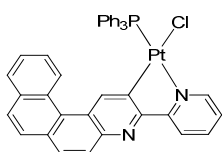

**3b**

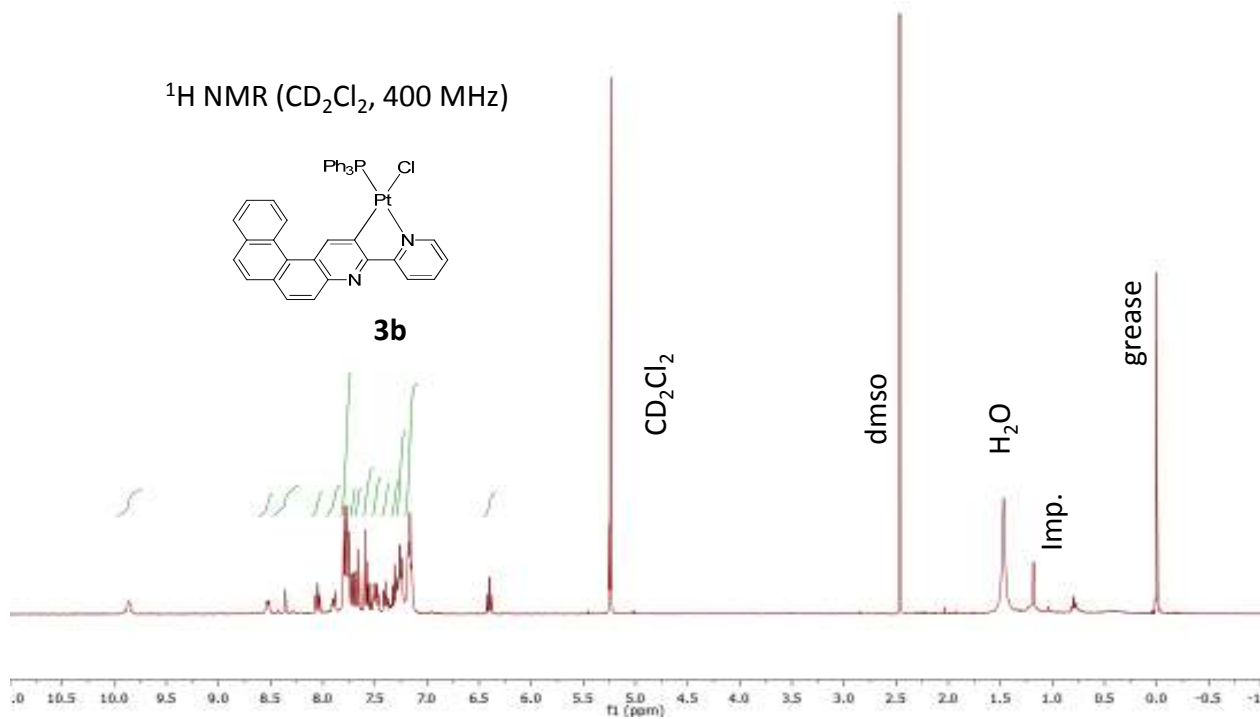

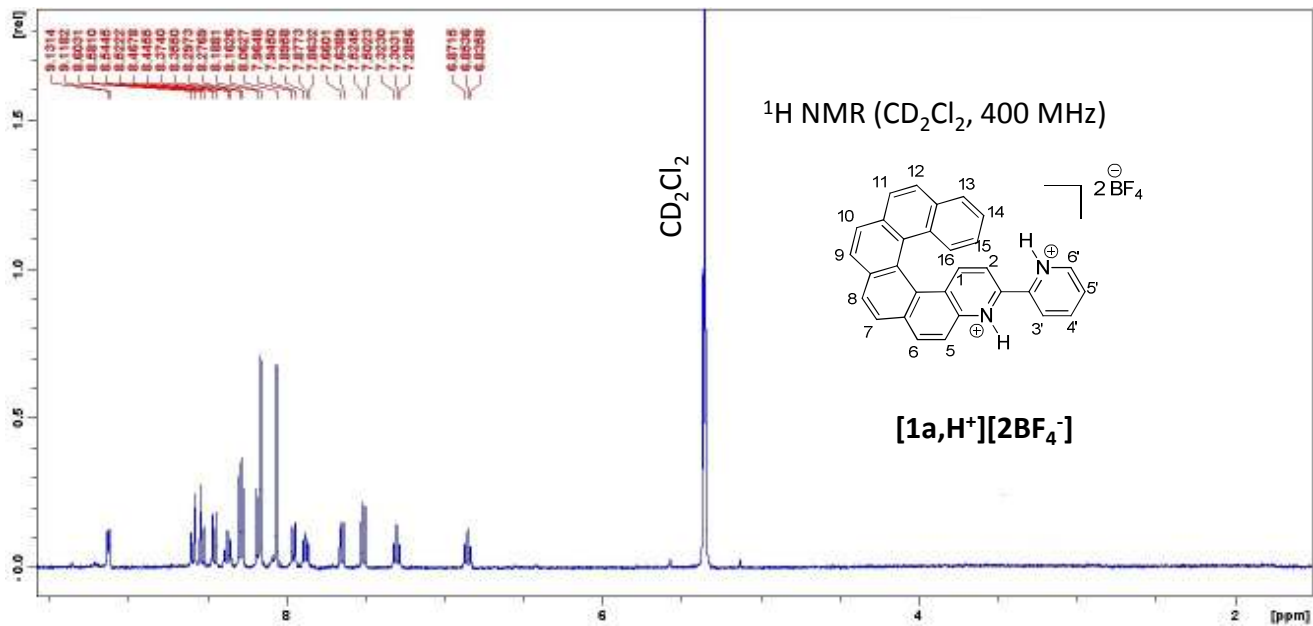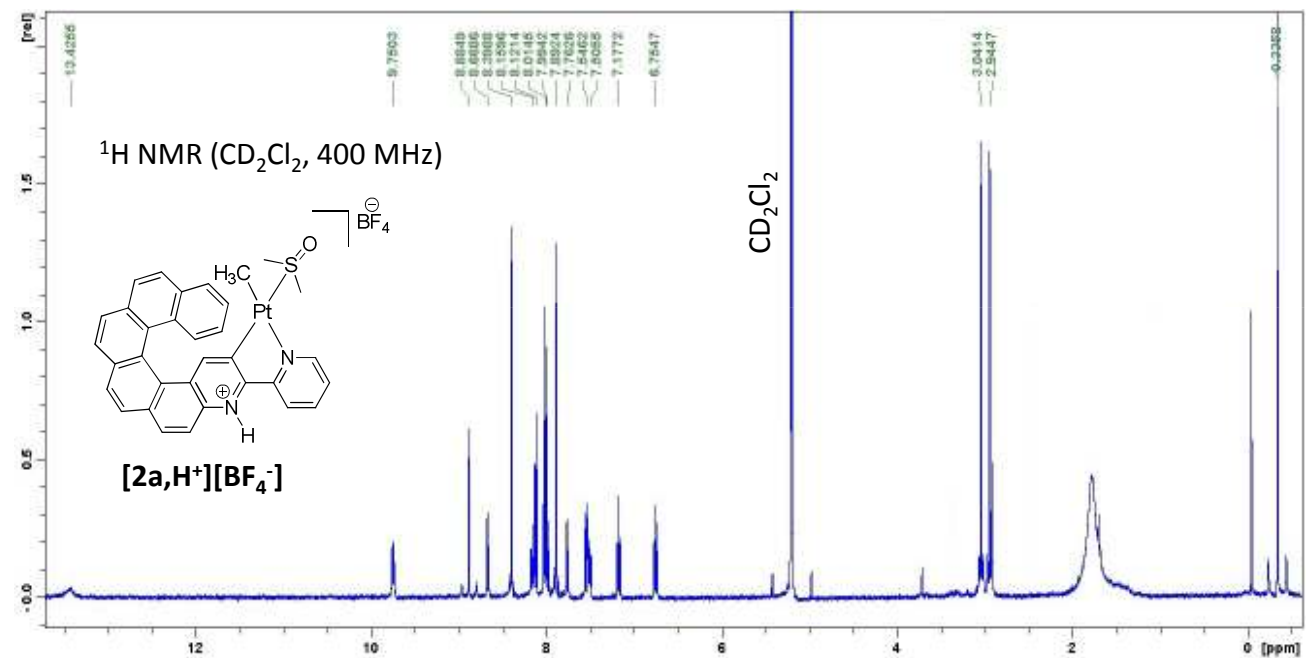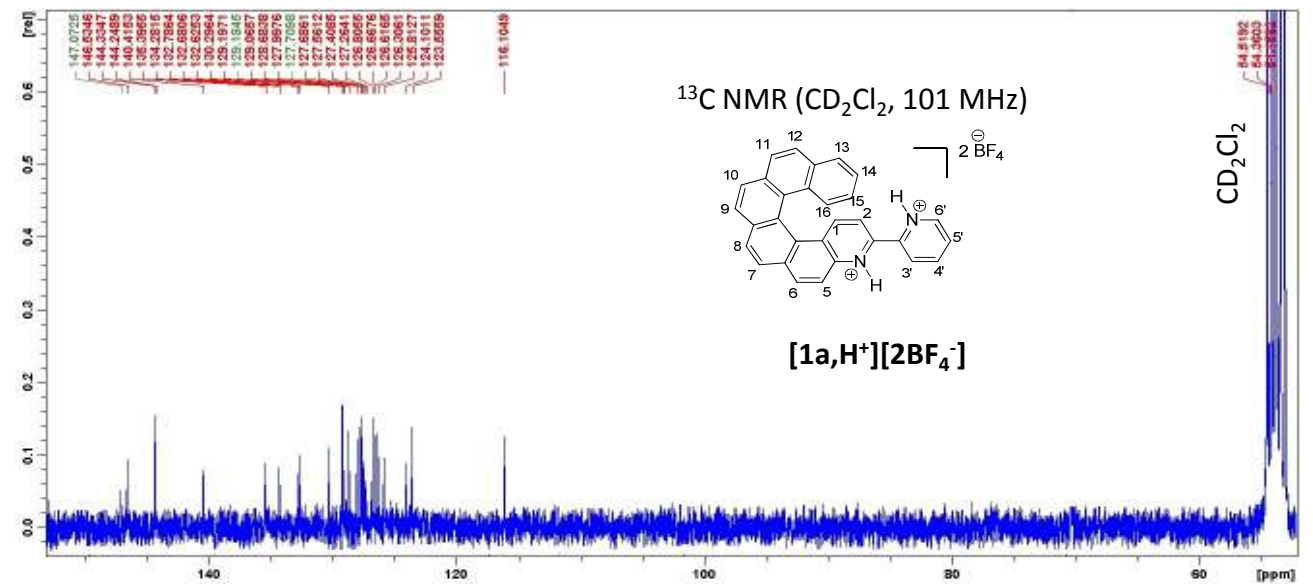

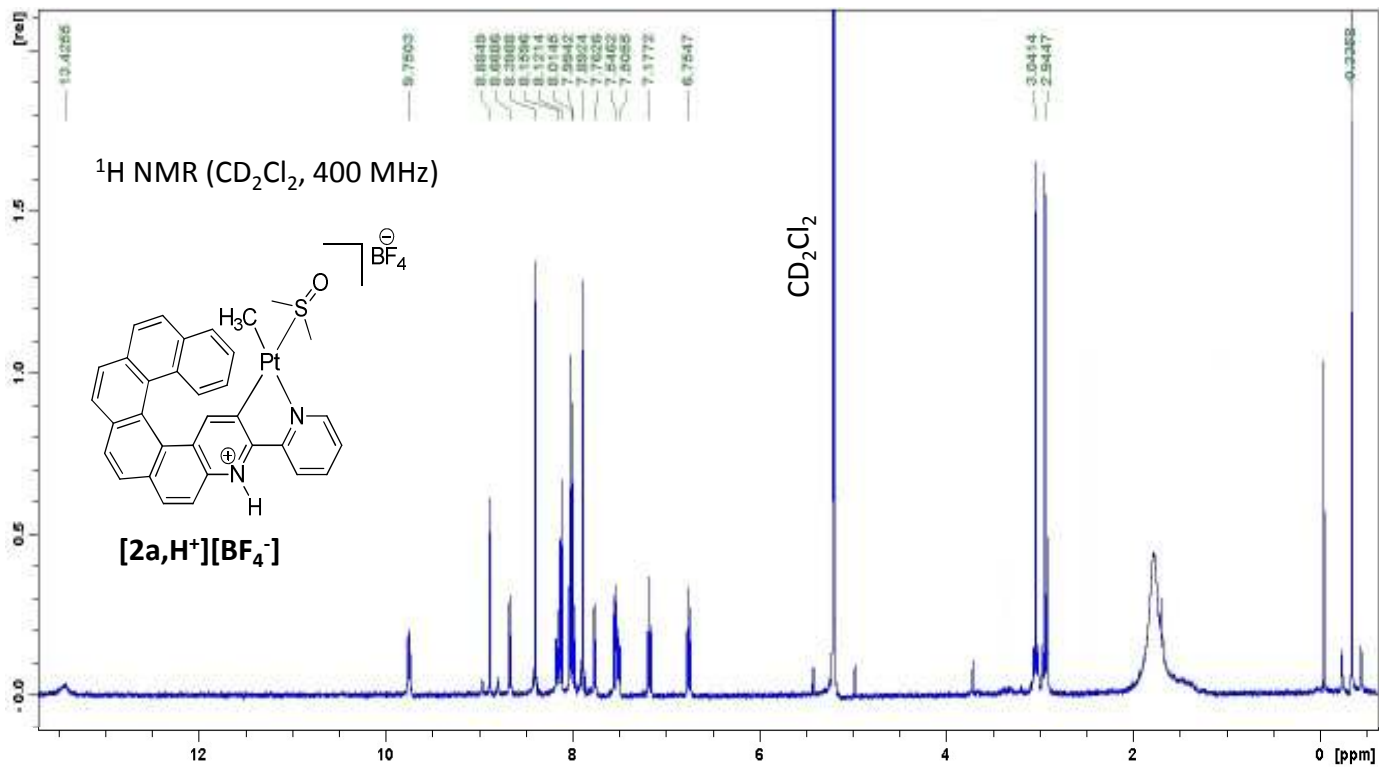

Supplement: NIHMS647574-supplement-Supporting_Information.pdf [file NIHMS647574-supplement-Supporting_Information.pdf]
